1     **Discovery of Latent Drivers from Double Mutations in Pan-Cancer**  
2                             **Data Reveal their Clinical Impact**

3

4     Bengi Ruken Yavuz<sup>1</sup>, Chung-Jung Tsai<sup>2</sup>, Ruth Nussinov<sup>2,3</sup>, Nurcan Tuncbag<sup>1,4,5,\*</sup>

5

6     <sup>1</sup>Graduate School of Informatics, Department of Health Informatics, Middle East Technical  
7     University, Ankara, 06800, Turkey

8     <sup>2</sup>Computational Structural Biology Section, Frederick National Laboratory for Cancer Research,  
9     National Cancer Institute at Frederick, Frederick, MD 21702, USA

10    <sup>3</sup>Department of Human Molecular Genetics and Biochemistry, Sackler School of Medicine, Tel  
11    Aviv University, Tel Aviv 69978, Israel

12    <sup>4</sup>Department of Chemical and Biological Engineering, College of Engineering, Koç University,  
13    Istanbul, Turkey

14    <sup>5</sup>School of Medicine, Koç University, Istanbul, Turkey

15

16    \*To whom correspondence should be addressed at [ntuncbag@ku.edu.tr](mailto:ntuncbag@ku.edu.tr)

17

18

19

20

## 21 **Abstract**

22 **Background.** Transforming patient-specific molecular data into clinical decisions is fundamental  
23 to personalized medicine. Despite massive advancements in cancer genomics, to date driver  
24 mutations whose frequencies are low, and their observable transformation potential is minor  
25 have escaped identification. Yet, when paired with other mutations *in cis*, such ‘latent driver’  
26 mutations can drive cancer. Here, we discover potential ‘latent driver’ double mutations.

27 **Method.** We applied a statistical approach to identify significantly co-occurring mutations in the  
28 pan-cancer data of mutation profiles of ~80,000 tumor sequences from the TCGA and AACR  
29 GENIE databases. The components of same gene doublets were assessed as potential latent  
30 drivers. We merged the analysis of the significant double mutations with drug response data of  
31 cell lines and patient derived xenografts (PDXs). This allowed us to link the potential impact of  
32 double mutations to clinical information and discover signatures for some cancer types.

33 **Results.** Our comprehensive statistical analysis identified 228 same gene double mutations of  
34 which 113 mutations are cataloged as latent drivers. Oncogenic activation of a protein can be  
35 through either single or multiple independent mechanisms of action. Combinations of a driver  
36 mutation with either a driver, a weak driver, or a strong latent driver have the potential of a  
37 single gene leading to a fully activated state and high drug response rate. Tumor suppressors  
38 require higher mutational load to coincide with double mutations compared to oncogenes which  
39 implies their relative robustness to losing their functions. Evaluation of the response of cell lines  
40 and patient-derived xenograft data to drug treatment indicate that in certain genes double

41 mutations can increase oncogenic activity, hence a better drug response (e.g. in PIK3CA), or  
42 they can promote resistance to the drugs (e.g. in EGFR).

43 **Conclusion.** Our comprehensive analysis of same allele double mutations in cancer genome  
44 landscapes emphasizes that interrogation of big genomic data and integration with the results of  
45 large-scale small-molecule sensitivity data can provide deep patterns that are rare; but can still  
46 result in dramatic phenotypic alterations, and provide clinical signatures for some cancer types.

47

48 **Keywords:** mutation doublets, molecular signatures of cancer, latent drivers, cancer genome  
49 analysis, passenger mutations

50

## 51 **Background**

52 Cancer is a disease of uncontrolled cell proliferation driven by molecular alterations. The impact  
53 of these alterations diffuses into the molecular interaction network and changes signaling  
54 pathways and transcriptional regulation in the cell. Not all alterations equally contribute to  
55 growth advantage of cancer cells. Some mutations are drivers; others are passengers [1].

56 Whereas it is generally believed that passenger mutations do not bestow proliferative effects on  
57 the disease phenotype, their properties and possible roles are not fully understood [2].

58 Comprehensive screening of thousands of p53 mutations and phenotypic characterization of  
59 these mutations have shown that mutations that maintain wild-type functionality of p53 are  
60 unlikely to be cancer drivers [3]. However, cancer genomics and evolutionary studies suggest  
61 that the accumulation of ‘slightly’ deleterious passenger mutations can slow cancer progression  
62 and this could be exploited for therapeutic purposes [4]. Lately, another class of mutations was

63 defined, dubbed “latent” or “mini-drivers” [5-7]. Latent mutations may assume a driver-like  
64 behavior yet were not identified as drivers per se. Latent drivers emerge during cancer evolution  
65 and their detection may help forecast cancer progression and improve personalized treatment  
66 strategies [6]. Driver mutations are classified into three types, strong driver, driver and weak  
67 driver. As for latent drivers, there are strong latent and weak latent drivers. Curated driver genes  
68 and mutations have been deposited in multiple databases [8-10] and used by multiple research  
69 groups to develop computational approaches to predict driver genes and driver mutations [11-  
70 16]. These methods, including the frequency-based methods, subnetwork identification methods,  
71 and 3D mutation search methods, have been comprehensively compared [17-19]. One of the  
72 concerns with frequency-based approaches is that prohibitively large sample sizes are needed to  
73 identify infrequently mutated driver genes. Thus, in frequency-based approaches, there is a risk  
74 of generating biased results due to background mutation rates [20]. Large databases catalog  
75 cancer driver genes and driver mutations and help in understanding the mechanism behind  
76 tumorigenesis. However, frequency-based approaches fail in the identification of rare drivers  
77 which can be tissue-specific [21]. A recent multidimensional analysis of cancer driver genes in  
78 IntOGen showed that some drivers are cancer-wide whereas others are specific to a limited  
79 number of cancer types [14].

80 Even a single mutation in a gene can be considered as a prognostic marker and change the global  
81 genome and protein expression, eventually altering the signaling pathways [22]. However, it has  
82 been estimated that the contribution of a single driver mutation to cancer progression is very  
83 small and needs additional mutations over time [23]. Despite DNA repair, somatic mutations  
84 accumulate and different genotypes in individual tissues are generated. This mechanism, called  
85 ‘somatic mosaicism’, offers driver or synergistic mutations an advantage in cancer cells [24].

86 Recently, the combination of single frequent mutations with a rare, or weak mutation in the *same*  
87 gene was shown to have a significant advantage in tumor progression and influence treatment  
88 response. These double mutations *in cis* in PIK3CA were shown to be more oncogenic, and more  
89 sensitive to an inhibitor compared to a single mutation [25]. A recent work cataloged ‘composite  
90 mutations’ of *multiple* genes – i.e. acting through same proteins – having more than one non-  
91 synonymous mutation in the same tumor [26]. Saito et al demonstrated the functional  
92 implications of multiple driver mutations in the same oncogene with an emphasis on PIK3CA  
93 [27]. Analysis of the rare mutations in cancer patients revealed known and hidden onco-drivers  
94 that are mutually exclusive in the same pathway suggesting epistatic mechanisms [28]. Many  
95 approaches are based on the principle that functionally-related genes have similar profiles of  
96 epistatic interactions [29]. One proposed explanation, typically for mutations in the same cellular  
97 pathway, involves functional redundancy. After a pathway has been mutated once, there is no  
98 evolutionary benefit to the clone from additional mutations in that pathway [29, 30].

99 Here, aided by informatics techniques, we systematically screen somatic mutations in pan-cancer  
100 data across ~80,000 patient tumors. We aim to find co-occurring patterns that are predominantly  
101 present in specific tissues and tumor types. Our screening reveals tumor-type specific double  
102 mutations on the same gene which may promote tumorigenesis and alter the response to  
103 treatments. It also reveals that tumors having at least one double mutations pair can lead to  
104 changes in response to drugs. We cataloged the components of double-mutations as latent  
105 mutations if their co-occurrence is significant and not yet labeled as a cancer driver. This led us  
106 to uncover 113 latent driver mutations. The oncogenic activation of a gene is through either  
107 single or multiple independent mechanisms of action. We present these different mechanisms  
108 through the same gene double mutations. Although the existence of a set of driver genes is

109 considered cancer-wide, we show that having double mutations on those genes is cancer-specific.  
110 Same gene double mutations are relatively rare; however, their impact is elevated in tumor  
111 progression.

## 112 **Methods**

### 113 **Data collection and Processing**

114 All available somatic missense mutation profiles are downloaded from two sources, The Cancer  
115 Genome Atlas (TCGA) and the AACR launched Project GENIE (Genomics Evidence Neoplasia  
116 Information Exchange) [31-33]. The TCGA mutation annotation file contains more than 11,000  
117 human tumors across 33 different cancer types. The GENIE mutation file (Release 6.2-public)  
118 contains 70679 samples across 671 cancer subtypes under Oncotree classification. The GENIE  
119 cohort contains multiple tumor barcodes belonging to the same tumor type. In such a case only  
120 one primary tumor barcode is kept for further analysis. We continued the analysis with 78837  
121 samples from 671 cancer subtypes and 34 tissues (including UNKNOWN and OTHER  
122 categories).

### 123 **Identification of Significant Double Alterations**

124 The total number of mutations is 1638191 in 19443 genes. We only evaluated dual combinations  
125 of 21983 (on 5062 genes) of these alterations observed on at least 5 tumors and constructed  
126 binary combinations of them. Then we created a contingency table for each combination of  
127 tumor numbers having both alterations, only the first or second alteration and none of those two  
128 alterations. Based on the contingency table, we calculated the p-value by using Fisher Exact Test  
129 with the formula below:

130 
$$\frac{\binom{a+b}{a}\binom{c+d}{c}}{\binom{a+b+c+d}{a+d}} \quad (1)$$

131

132 where a is the number of tumors having both alterations, b is the number of tumors having only  
133 the first alteration, c is the number of tumors having only the second alteration and d is the  
134 number of tumors not having these two alterations.

135 228 significant pairs and 227 non-significant pairs were decided using the Fisher Exact Test for  
136  $p=0.05$ . We used the Catalog of Validated Oncogenic Mutations from the Cancer Genome  
137 Interpreter [10] to label dual mutation components: if a mutation is among the 5601 driver  
138 mutations, we label it as known driver (D), otherwise potential latent driver (d). We then  
139 classified a known driver mutation as a driver if it is present in more than 500 tumors; otherwise,  
140 it is a weak driver. Similarly, we dubbed a potential latent driver mutation as a strong latent  
141 driver if it is present in more than 10 tumors; otherwise, we classified it as a weak latent driver.

142 Additionally, double mutations are annotated based on their functions, domains, chemical  
143 properties and structural proximity (see Supplementary Text)

#### 144 **Survival Analysis**

145 For survival analysis, 10336 patients in MSK impact 2017 and 11160 patients in TCGA and their  
146 overall survival status are used [31, 33]. We compared survival times of tumor groups with  
147 significant same/different gene double mutations and single mutations in a specific cancer  
148 subtype. The first group is the union of patients with significant doublets whereas the second is  
149 the union of patients that carry only one component of these significant double mutations. Then

150 we gathered overall survival times (time in months) and vital status (1: Deceased, 0: Alive) of  
151 these patients for survival analysis.

152 We utilized the “survival” library of R to do Kaplan Meier Survival Analysis of double and  
153 single mutant groups. The survival probability at any particular time is calculated by the formula  
154 given below [34]:

$$155 \quad S_t = \frac{(Number\ of\ subjects\ living\ at\ the\ start) - (Number\ of\ subjects)}{Number\ of\ subjects\ living\ at\ the\ start} \quad (2)$$

156

### 157 **Oncoprint Maps**

158 To reveal mutual exclusivity and co-occurrence patterns between double mutations we plotted  
159 oncoprint maps by using ComplexHeatmap package of R [35].

### 160 **Cell Line Network Construction**

161 We obtained a list of cell lines with the dual mutations from Cell Model Passports and their drug  
162 response information from CancerrxGene [36, 37]. We also extracted information about drug  
163 targets and target pathways. We used 2 different approaches to select drugs for PTEN, APC, and  
164 PIK3CA dual mutant cell lines: if a drug is in the gray zone ( $|z\text{-score}| \leq 2$ ) in the single mutant  
165 cell lines but gives a significant drug response in a dual mutant cell line ( $|z\text{-score}| > 2$ ). If there is a  
166 single mutant cell line that is sensitive (or resistant) to the drug but the dual mutant cell line gives  
167 an opposite response to the drug. (Drug response flips sensitive into resistant or resistant into  
168 sensitive between single and dual mutant cell lines).



169 For EGFR we selected drugs that give significant drug response either in the single or dual  
170 mutant cell line. Then we formed networks connecting mutations to cell lines, cell lines to drugs,  
171 and drugs to their target pathways.

## 172 **Patient-Derived Xenograft Analysis**

173 We used the mutation profiles, transcriptomic data and drug responses of patient-derived  
174 xenografts in [38]. We determined xenografts harboring significant doublets. Then, we compared  
175 changes in tumor volumes of single and dual mutant xenografts for the untreated and drug-  
176 treated cases (single mutation is part of a significant dual mutation). We preferred to specify the  
177 time intervals in multiples of 5. When a given timepoint is not a multiple of 5, we used linear  
178 interpolation between two nearest numbers containing a multiple of 5.

$$179 \quad Vol_i = Vol_{i-1} + \frac{t_i - t_{i-1}}{t_{i+1} - t_{i-1}} (Vol_{i+1} - Vol_{i-1}) \quad (6)$$

180

181 where  $t_i$  is a timepoint that is multiple of 5 between the given timepoints  $t_{i-1}$  and  $t_{i+1}$  and  $Vol_i$  is  
182 the volume ( $\text{mm}^3$ ) at timepoint  $i$ .

## 183 **Results**

### 184 **Discovery of Latent Drivers through Double Mutations**

185 The availability of a vast amount of pan-cancer genomic data helps to find mutational patterns  
186 that can be signatures of the specific tumor tissues or cancer types. Multiple mutations in a single  
187 gene rarely co-occur in patient tumors. However, when they are together, they may cause  
188 dramatic phenotypic differences [25-27]. For example, dual mutations in PIK3CA increase the  
189 sensitivity to PI3K inhibitors in breast cancer [25], while dual mutations in EGFR predominantly

190 exist in lung cancer [39]. A strong driver may couple with a weak driver or a latent driver to  
191 increase the pathological impact of the alterations. This pattern also gives insight into the latent  
192 drivers that are context specific. We exploited the dual mutations to discover latent drivers. For  
193 this purpose, following the Oncotree classification we obtained and cataloged missense mutation  
194 profiles of ~80,000 tumors from TCGA and GENIE Pan-Cancer datasets from 34 main tissues  
195 and 672 cancer subtypes including tissues tagged as Unknown and Other (Figure 1A). Collecting  
196 all missense mutations on each gene and counting their pairwise combinations result in 228  
197 significant double mutations (p-value < 0.05, Fisher exact test). Especially, when single  
198 mutations across patient tumors are systematically reduced in the co-occurring mutation patterns,  
199 the double mutations are revealed to be cancer specific. We also assembled tissue-specific sets of  
200 double alterations since tissues differ in sample size and are enriched in different genes and  
201 mutations. As shown in Figure 2A, co-occurring double mutations on the same gene are  
202 relatively rare, with varied frequencies across tissues. In some cancer tissues, doublets are  
203 present on the same gene in up to 10% of the patient tumors. However, same gene doublets are  
204 either extremely rare or not present in other tissues, such as the pancreas, ovary, liver, kidney,  
205 biliary tract. Same gene double mutations accumulate on 35 genes in the pan-cancer dataset of  
206 which 20 genes are tumor suppressors (TSG), 12 are oncogenes (OG) and the rest labeled as  
207 both.

208 Recently, the frequency of driver genes was analyzed together with the maximum prevalence of  
209 their mutations, distinguishing cancer-specific drivers versus cancer-wide drivers [14]. We  
210 applied a similar analysis to our dataset composed of double mutations on the same gene where  
211 we obtained the ratio of the number of tissues carrying double mutations ( $T_{\text{double}}$ ) and single  
212 mutations ( $T_{\text{single}}$ ). We also calculated the prevalence of double mutations compared to single

213 mutations. As a result, although some genes and their single mutant states have been previously  
214 cataloged cancer-wide, we found sets of double mutations that are cancer tissue-specific.  
215 Examples include double mutations in PTEN, EGFR, and KRAS (Figure 1B).

216 We retrieved the known driver mutations from the Cancer Genome Interpreter database to  
217 evaluate if the double mutations are composed of known drivers or other mutations that are not  
218 cataloged as drivers but can be considered as ‘potential latent driver’ mutations. In a doublet, the  
219 components can be known drivers or potential latent drivers, so each doublet is cataloged as DD,  
220 Dd and dd. That is, DD is a known driver-known driver doublet, Dd is a known driver-potential  
221 latent driver and dd is a doublet consisting of two potential latent drivers. Among the 228 same  
222 gene double mutations, there are 115 DD, 28 Dd, 85 dd where the mutations that are not  
223 catalogued as driver are potential latent drivers (the 228 same gene double mutations are  
224 composed of 91 known major drivers, 113 potential latent drivers). Thus, our analysis can  
225 capture rare mutations that are potential latent driver candidates. We observe that oncogenes  
226 have significantly more DD mutations than tumor suppressors ( $p\text{-value} < 10^{-4}$ ), although their  
227 background probability to have a double mutation is similar (Figure 1C). This result implies that  
228 becoming more oncogenic requires mostly co-occurrence of two frequent mutations while  
229 suspending tumor suppressor activities may involve rare mutations coming together.

230 Tumor suppressor genes have 131 double mutations in 883 patient tumors and oncogenes have  
231 91 double mutations in 1000 patient tumors. Patient tumors that have at least one double  
232 mutation in any TSG have a significantly higher passenger mutation load compared to patient  
233 tumors having at least one double mutation in an oncogene ( $p\text{-value} < 10^{-11}$ , Figure 1D). These  
234 results imply that double mutations are very rare. Especially tumor suppressor genes require a  
235 very high mutation load for two coexisting mutations in a single gene. Based on the mutation

236 load, and in line with our previous result, loss of function through double mutations in TSGs  
237 requires considerably higher mutational load compared to gain of function in oncogenes.

238 Known driver mutations have a higher frequency than potential latent driver mutations (Figure  
239 1E). The median values of tumor counts for known driver and potential latent driver mutations  
240 are 170 and 35.5, respectively (p-value <  $5 \times 10^{-20}$ ). Potential driver mutations are relatively rare,  
241 and their pathological impact can be dramatic when they couple with another mutation.

242 Therefore, we cataloged all potential latent driver mutations that contribute to a significant  
243 doublet in the same gene as strong or weak latent drivers. The list of 113 latent drivers is given in  
244 Table S1.

245 Next, we followed a bottom-up approach to obtain the spatial, chemical, and pathway level  
246 organization of the double mutations. We used the pan-cancer mutation clusters deposited in  
247 3DHotspot where each cluster represents the set of mutations that are spatially close to each  
248 other [40]. We found that components of the doublets in the same gene are usually spatially  
249 distant from each other. The simultaneous presence of spatially close two strong driver mutations  
250 is very rare in a patient tumor. However, some weak drivers are proximal to either a strong driver  
251 or another weak driver, as in the cases of mutations at positions 711, 714, 715 in BRAF.

252 Spatially close residues may form potent allosteric couples, which may enhance proliferation.

253 Analysis of the chemical class of doublets in oncogenes and tumor suppressor genes harboring  
254 the same gene doublets revealed that Charged-Polar and Hydrophobic-Charged switches are  
255 more dominant among tumor suppressors and oncogenes respectively (Figure 1F). Double  
256 mutations are either located in flexible or hinge or disordered regions or in different domains  
257 (Supplementary Text, Figure S1A). Components of each double are annotated in different  
258 molecular functions (Supplementary Text, Figure S1B).

## 259 **Doublets on the Same Gene are Rare, but are a Signature for Some Cancer Types**

260 Figure 2A illustrates the tissue-specific prevalence of double mutations in the same gene. TP53  
261 and its double mutations are cancer wide. A recent study verified that PIK3CA double mutations  
262 *in cis* increase oncogenicity and sensitivity to PI3K $\alpha$  inhibitors [25]. In our dataset, PIK3CA  
263 double mutations are also quite common in breast and uterus tumors. In the uterus, PIK3CA  
264 mutations are more inclined to constitute double mutations (around 90%). Among lung tumors,  
265 EGFR and bowel tumors APC double mutations are ahead by far. Bowel, breast, and lung tissues  
266 are enriched with double mutations on specific genes whereas brain tissue has significant double  
267 mutations in multiple genes such as BRAF, FBXW7, KDM5A, STAG2, TP53, TSC1. LUAD  
268 (Lung Adenocarcinoma) is enriched with EGFR dual mutations. 90% of the EGFR mutations are  
269 in more than 160 tumors. COAD (Colon Adenocarcinoma) is enriched with APC and PTEN dual  
270 mutations. We note that PIK3CA double mutations are relatively more dominant in BRCA,  
271 COAD, and UCEC subtypes (Figure 2B). A set of known driver mutations, for example in  
272 KRAS and IDH1 are usually present as single mutations but are frequently paired with mutations  
273 in other genes. The most frequent IDH1 mutation occurs at position 132 located in the interface  
274 of its homodimer [41].

275 The most frequent mutation, KRAS<sup>G12D</sup>, is rarely coupled with another mutation in KRAS. The  
276 mutational mosaic of KRAS is distinguishable in different cancer types. KRAS<sup>G12D</sup> is  
277 predominantly present in pancreatic and colorectal cancers [42]. KRAS mutations are context-  
278 specific and a mutation may act in different cancers. However, among this limited number of  
279 KRAS double mutations, KRAS<sup>G12D/A149T</sup> accumulates in lung tissue and only exists in primary  
280 tumors in our dataset. KRAS<sup>A146T</sup> promotes opening of Switch I in GEF mediated GDP-GTP  
281 nucleotide exchange whereas KRAS<sup>G12D</sup> abolishes GAP-mediated hydrolysis [43].

282 Figure 2C illustrates some sequence details. In APC, EGFR, PTEN, and TP53 the diversity of  
283 the double mutations is limited, but this is not the case in PIK3CA and BRAF. Among them,  
284 BRAF<sup>V600E</sup>, a strong driver, is rarely coupled with another BRAF mutation, but the rest are  
285 (Figure S2A). Other BRAF mutations such as at 711, 714, 715, and 721 are close to each other  
286 and coupled in a set of patients, especially in brain tissue (Figure S2B and S2C).

287 Another interesting case is the double mutations in the cohesin complex. Mutated cohesin can  
288 enhance Wnt signaling by stabilizing beta-catenin [44]. Targeting Wnt signaling in cohesin  
289 mutant cancer cells was proposed as a novel therapeutic strategy. Double, even multiple  
290 mutations in the components of the cohesin complex (Figure S3A) in the same tumor may  
291 dramatically increase Wnt signaling. In Figure S3B, we notice that STAG2 double mutations  
292 accumulate in the brain, RAD21 and SMC3 double mutations are prominent in lymph and  
293 myeloid tissues.

#### 294 **The Clinical Impact of Double Mutations in PIK3CA**

295 PIK3CA is a large protein with drivers e.g. H1047R, E545K and weak drivers such as R88Q,  
296 E453K, M1043I. It is the second (or third) most highly mutated protein and its number of double  
297 mutations is also relatively higher than other proteins. The pathological impact of a single driver  
298 may be insufficient. Full activation of oncogenic PIK3CA is through two drivers acting in  
299 different, albeit complementary mechanisms. One well-known example is H1047 and E545  
300 double mutations enhancing proliferation [45]. However, E545 and E542 double mutations do  
301 not make PIK3CA reach the fully activated level. Also, the combination of two strong latent  
302 driver mutations – but not two weak – can act like a driver mutation.

303 In our dataset of significant double mutations, 46 of the 228 are in PIK3CA. Enhanced activation  
304 of PIK3CA via dual mutations is shown in Figure 3A, where most of them are composed of one  
305 frequent and one rare mutation. Our frequency-based analysis revealed that P104, E726 and  
306 M1004 might be a strong latent drivers coupled with a driver mutation. PIK3CA double  
307 mutations are also tissue- and context-specific as shown in Figure 3B. Most are in breast tissue.  
308 An exception involves R88Q doublets which are depleted in breast but frequent in uterus tumors.  
309 Their structural location is shown in Figure 3C. Kinase mutations work by destabilizing the  
310 inactive or stabilizing the active state. These are better captured by their detailed conformational  
311 consequences. The mechanisms of activation of PI3K $\alpha$  by these driver mutations have been  
312 recently worked out [45-47]. Unsurprisingly, considering their diverse mechanisms of action no  
313 clear trend is observed in the calculated folding free energy ( $\Delta\Delta G$ ) upon double or single  
314 mutation with DynaMut [48] (Suppl. Text and Figure S4). If the components of double mutations  
315 act via distinct mechanisms, the additivity of their activation potential is high; otherwise the  
316 additivity is low as in the E545/E542 example where the mutations execute the same mechanism  
317 of action.

318 The impact of co-occurring mutations in the same gene is mostly additive but can be also  
319 cooperative. There are seven allosteric mutations at positions 83, 88, 365, 539, 542, 603, 629 in  
320 PIK3CA in BRCA as cataloged in Allosteric DB [49]. We found 23 significant double mutations  
321 in PIK3CA in the BRCA subtype of breast tumors. Dual mutations PIK3CA<sup>1047/88</sup>,  
322 PIK3CA<sup>1047/539</sup>, PIK3CA<sup>1047/539</sup> are composed of one known driver (at position 1047) and one  
323 weak driver mutation (PIK3CA<sup>88</sup> and PIK3CA<sup>539</sup>) which are allosteric mutations. Their effects  
324 are additive.

325 To further evaluate the double mutations, we used cancer cell lines from the DepMap project and  
326 patient-derived xenograft (PDX) samples in [38]. In both datasets, mutation profiles and  
327 response to drug treatment information are available. Additionally, we used the temporal data on  
328 tumor volume growth in PDX samples in untreated conditions and drug-treated conditions.

329 We found two breast cancer cell lines belonging to the BRCA subtype: BT-20 has a double  
330 mutation PIK3CA<sup>1047/539</sup> and Cal-148 has PIK3CA<sup>1047/350</sup>. H1047R is a frequent driver. However,  
331 539 and 350 are rare mutations in the Pan-cancer data, making them weak drivers. To explore the  
332 impact of the double mutations in terms of drug response, a network of cell lines to drugs and  
333 target pathways is constructed (Figure 3D) where drugs are linked to each cell line which has  
334 altered response compared to their single mutation counterparts. Cal-148, which has  
335 PIK3CA<sup>1047/350</sup>, is more sensitive to drugs targeting the PI3K/mTOR pathway compared to the  
336 single mutant cell lines. Indeed, we found a difference in the response to PIK3 $\alpha$  inhibitors in  
337 double-mutant cell line BT-20 which is more sensitive to this class of inhibitors compared to  
338 single mutant cell line counterparts (p-value=0.015). Additionally, an evaluation of other classes  
339 of inhibitors showed that the PIK3 $\gamma$  inhibitor CZC24832 does not work on single mutant MFM-  
340 223, but double mutant BT-20 is sensitive to it (Figure 3E).

341 We retrieved PDXs having double mutations in PIK3CA to explore the tumor volume changes  
342 and drug responses compared to single mutant PDXs. Properties of the patient tumors can be  
343 maintained in xenografts and can help assess the impact of double mutations. We found three  
344 PDXs having double PIK3CA mutations (726/1047, 88/542, 88/1025). In PDX X-2524  
345 H1047R/E726K, a strong driver/strong latent driver combination, the volume change of the  
346 tumor between days 0 and 10 is more than 1700 mm<sup>3</sup>, while single mutant tumors X-3077 and  
347 X-3078 (with mutation H1047R) have volume change of ~200 mm<sup>3</sup> in the first 10 days reaching



348 ~400 mm<sup>3</sup> at around 35 days (Figure 3F). H1047R/E726K tumors grow significantly faster  
349 compared to the single mutant case.

350 We analyzed the effects of drugs on tumor growth of these three PDX tumors. We observed that  
351 BYL-719 (Alpelisib), a selective PI3K $\alpha$  inhibitor, diminishes tumor volume by 88% (around  
352 1600 mm<sup>3</sup>) in the first 10 days in the double mutant in the xenograft (X-2524) (Figure 3G).

353 Because the tumor volume growth is mild in the single mutant xenografts X-3077 and X-3078  
354 the volume difference between the initial tumor and after 10 days of treatment with BYL-719 is  
355 not as high as in dual mutant X-2524. Also, we noticed that BYL-719 treatment combined with  
356 LJM716, an anti-HER3 monoclonal antibody, is more effective in reducing tumor volume than  
357 BYL-719 treatment alone (Figure 3H). Dual mutation E726/H1047 makes the tumor grow  
358 significantly faster compared to the single mutant case. The double mutant tumor is also more  
359 sensitive to PI3K inhibitors.

360 However, not all doublets increase the PIK3CA oncogenic activity. For example, the impact of  
361 double mutation R88/T1025 (a combination of weak drivers) differs from E726K/H1047R in the  
362 screened PDX tumors. The growth rate of the tumor with R88/T1025 is slower than the tumor  
363 having a single mutation (at position 88). The tumor with only R88 is more responsive to PI3K  
364 inhibitors compared to that with R88/T1025 (Figure S5A-H).

365

### 366 **Linking Double Mutations to Clinical Data Using Cancer Cell Lines and Xenografts**

367 Dual mutations may increase the activation strength and enhance drug response. In Figure 4 we  
368 show driver mutations combined with weak drivers or strong latent drivers in EGFR, BRAF,

369 APC and PTEN. Below, we probe PTEN, APC and EGFR double mutations with respect to drug  
370 treatments.

371 We screened all significant doublets across cell lines and PDX tumors. Double mutations are rare  
372 in the patient tumor samples and in cancer cell lines. Treatment data of patients are limited.

373 Therefore, we aim to associate each marker double mutation with the cell lines or PDXs and  
374 assess their phenotypic impact through drug response data compared to their single mutant  
375 counterparts. In this way, we can assess the clinical impact of the same gene dual mutations and  
376 link the dual mutation patterns to drug response. We used the DepMap dataset together with Cell  
377 Model Passports to retrieve the mutational profile of cancer cell lines and the response to a panel  
378 of hundreds of drugs. We notice the same pattern: despite scanning hundreds of cancer cell lines,  
379 double mutations on the same gene are rare. In Figure 5, double mutations are linked to cell lines  
380 having the same pair, and cell lines are linked to drugs causing a significant response. These  
381 links are represented as a network of mutations, associated cell lines, and drugs. We listed some  
382 of the striking results on how dual mutations can alter the response to the drug in the same tissue.

383 Among 228 same gene mutations only 17 doublets match with one or more cell lines in Cell  
384 Model Passports [36]. We constructed a network by using Cytoscape [50] with 4 different node  
385 types, mutations (components of a double mutation), cell lines, drugs, and drug target pathways.  
386 In the same gene double mutation network, there are 22 mutations, 19 cell lines, 206 drugs, and  
387 22 drug target pathways nodes with 548 edges between them. In Figure 5A, we show the  
388 prevalence of the same gene dual mutations in corresponding tissues of the cell lines. These are  
389 consistent with the patient tumor doublets obtained in the previous section.

390 One example is EGFR<sup>L858R/T790</sup> doublet, a combination of two driver mutations (Figure 4A), in  
391 one cell line (NCI-H1975) of lung cancer. H3255 cell line has only one mutation at position

392 L858 in EGFR (Figure 5B). Both mutations are on the tyrosine kinase domain to which the RTK  
393 inhibitors bind (PDB: 4IF23, Figure 5C). However, response to the inhibitors is significantly  
394 different in cell line with dual mutant EGFR which is more resistant compared to the single  
395 mutant cell line (p-value=0.01, Figure 5D).

396 BRAF has multiple double mutations (Fig. 4B). The most significant doubles contain the V600  
397 strong driver and one of the strong latent drivers (I710, L711, I714, E715, L721). E715 is in the  
398 interface of the BRAF homodimer and the other strong latent drivers are in the same 3D cluster  
399 with E715. These mutations are not annotated based on their clinical or kinase activity; however,  
400 contributing to a significant double mutation make them strong latent driver candidates. They  
401 can be further analyzed based on their mechanism of action complementing V600. The  
402 mechanisms of BRAF mutations were classified into those signaling as active monomers, those  
403 acting as constitutive active dimers, and those having impaired/dead kinase activity [51]. Despite  
404 being very rare in our dataset, we have three cases of impaired/dead mutations paired with other  
405 classes: BRAF<sup>G469/K601</sup>, BRAF<sup>G466/L597</sup>, and BRAF<sup>G466/V600</sup>. Another rare double mutation is  
406 BRAF<sup>L597/K601</sup>. The double mutation components lead to a constitutively active dimer,  
407 independent of Ras. The mutations may increase Raf affinity. A combination of strong latent  
408 drivers located at or close to the dimer interface can fit into this activation mechanism. To  
409 identify these pairs a larger dataset is necessary, but still we can identify some rare doubles that  
410 need clinical evaluation.

411 A second example involves PTEN (Figure 5E). PTEN<sup>R130/R233</sup> and PTEN<sup>R130/F341</sup> doublets, both  
412 composed of a driver and a weak driver mutation (Figure 4C), exist in two cell lines which differ  
413 in response to drugs as compared to their single mutant counterparts. Although single mutant  
414 PTEN is resistant to drugs targeting ERK/MAPK signaling, cell lines having dual mutant PTEN

415 are sensitive to these drugs. Additionally, cell line SNU-81 having PTEN<sup>R130/R233</sup> becomes  
416 resistant to genome targeting drugs compared to single mutant cell lines.

417 The lower panel of Figure 5F presents APC dual mutations with associated cell lines. The  
418 subnetwork shows that cell line SW837 carrying dual mutant APC (R1450\*/R213\*, a  
419 combination of weak drivers (Figure 4D) becomes resistant to drugs targeting PI3K/TOR  
420 signaling when compared to the single mutant cell lines. Additionally, in the patient-derived  
421 xenograft dataset from [38], there is one xenograft carrying R1450\*/R876\* dual mutation (a  
422 combination of two weak driver mutations), model id X-1290, and one carrying single R1450\*  
423 mutation, model id X-1173. We compared volume changes of these xenografts. For the dual  
424 mutant xenograft X-1290 is ~1500 mm<sup>3</sup> in the first 30 days and for the single mutant xenograft  
425 X-1173 ~1200 mm<sup>3</sup>. The dual mutant xenograft does not encounter any tumor volume change  
426 during the first 70 days when treated with Cetuximab, an EGFR inhibitor, while the single  
427 mutant xenograft keeps growing around 900 mm<sup>3</sup> during the first 15 days (Figure S6A-D).

428 Despite the small number of patients with follow-up information, Kaplan-Meier survival analysis  
429 comparing single and same gene double mutant patient groups demonstrates a significant  
430 difference between the two groups. Patients with double mutant PIK3CA (H1047/R88) and APC  
431 (R876/T1556) have worse survival than their single mutant counterparts. On the other hand, the  
432 patient group with PTEN double mutation (R130/R173) has a better survival than the single  
433 mutant group (Figure S7A-C).

434

## 435 **Discussion**

436 The highly heterogeneous molecular profiles of tumors compel comprehensive studies to reveal  
437 the underlying patterns resulting in their dramatic phenotypic differences. Distinguishing cancer  
438 drivers from passengers has been one of the key objects of such studies. Here we scan the cancer  
439 genome landscapes aiming to identify latent drivers. We designed this study to discover latent  
440 driver mutations based on the hypothesis that some rare, or weak mutations can cooperate with  
441 other, *in cis* mutations, to enhance the oncogenic signal. In terms of population of conformations,  
442 conceptually, a strong driver mutation is close to a fully activated state with more than 90% of  
443 the population in the active state. However, the contribution of other types of drivers in the gene  
444 toward reaching a fully activated state can differ. For example, the contribution of a driver to the  
445 active state population can be between 50-75%, that of a weak driver is around 50% and the  
446 contribution of a strong latent driver is above 25%. This implies multiple mechanisms of action  
447 of double mutations relating to the combination of a driver mutation with either driver, weak  
448 driver, or strong latent driver. Latent driver mutations are protein context-specific having driver-  
449 like behavior but not identified as driver. We identified 228 significant, same gene double  
450 mutations which are composed of mostly one rare and one frequent mutation. Components of  
451 these double mutations are labelled as latent drivers if they have not been previously cataloged as  
452 driver. We newly cataloged 113 latent drivers. Despite being cancer-wide on their own, coupling  
453 with another mutation increases the cancer-type specificity and decreases the prevalence of these  
454 double mutations. The mutation load of tumors having a doublet in a tumor suppressor is  
455 significantly higher than in an oncogene, indicating their relative robustness to functional loss.

456 With the sparsity of patient treatment datasets, cell lines or patient-derived tumor xenografts are  
457 a useful clinical interpretation resource. We found significant differences in the response to PI3K  
458 inhibitors in double mutant PIK3CA samples which is in line with the recent work by Vasan et al

459 [25, 27]. Additionally, tumor growth is extremely fast in double mutant PIK3CA compared to  
460 the single mutant. This phenotypic difference has been shown by Vasan et al for the couples of  
461 potential latent driver PIK3CA mutations E726, and weak drivers E453, M1043 with known  
462 driver mutations E542, E545, and H1047. Recent mechanistic studies suggest that the increased  
463 gene activity or acquired drug resistance is due to the mutation combinations. Zhang et al. [45]  
464 suggested that combinations of strong and weak drivers can enhance PI3K activity and explain  
465 the phenotypic differences in PIK3CA double mutant tumors, that we observed prominently in  
466 breast and uterus tumors. Here we further extended the analysis to combinations of less frequent  
467 mutations not catalogued as driver, which we view as potential latent drivers. Among them  
468 doubles with mutation at position R88 are depleted in breast but not in uterus, suggesting that  
469 potential latent driver mutations pairing with the mutation R88 are important signatures of uterus  
470 tumors.

471 Not limited to PIK3CA, numerous other significant double mutations with possible prognostic or  
472 therapeutic impact have also been identified (i.e. APC doublets in the bowel, EGFR in the lung  
473 in line with previous studies [26]). Some have not been previously analyzed clinically but have  
474 potential impact on drug response. For example, APC R1450/R876 double mutation results in  
475 significant sensitivity to cetuximab compared to single mutant APC R1450 in PDXs. On the  
476 other hand, cell lines having APC R1450/R213 doublet became resistant to PI3K/mTOR  
477 signaling inhibitors. Our approach also identified several rare same gene doublets, like the ones  
478 on cohesion complex subunits STAG2, RAD21, SMC3. This protein complex is important for  
479 sister chromatid cohesion, chromosome segregation, DNA repair, genome organization, and gene  
480 expression. The STAG2 subunit of the complex is highly mutated in bladder and myeloid  
481 cancers, and LOF mutations on STAG2 are correlated with DNA damage [52-54].

482 The sensitivity or responsivity of a drug action to a targeted cancer depends on how much the  
483 tumor relies on the particular oncogene and the cellular pathway with which it is associated. In  
484 PIK3CA, a combination of a driver mutation with either driver, weak driver, or strong latent  
485 driver, particularly under different mechanism of actions, have a good therapeutic response.

486

## 487 **Conclusions**

488 In conclusion, we developed a comprehensive approach to discover latent driver mutations. We  
489 integrated molecular profiles of more than 80K patient tumors, drug treatment data of cancer cell  
490 lines and PDXs from multiple sources to reveal associations between molecular alterations to  
491 discover latent co-occurring driver mutations in the same allele, in non-redundant pathways and  
492 metastatic patterns with the help of multiple informatics techniques and interpret them through  
493 their clinical impact. Our results, supported by drug response data of cell lines and patient-  
494 derived xenografts, and transcriptomic profiles of single and double mutant tumors, provide a  
495 strong background for therapeutic potentials of double mutations. We believe that the results of  
496 this study may form a basis for further experimental evaluation of molecular alterations to be  
497 exploited for therapeutic purposes across different cancer types. Mechanistically, the actions of  
498 *same gene* double mutations are more straightforward to interpret as compared to double  
499 mutations in different protein in independent pathways. How double mutations in independent  
500 pathways work is highly challenging to understand.

501

## 502 **Figure Legends**

503 **Figure 1.** Overall statistics of the data set, mutation load and double mutations, and analysis of  
504 the significant double mutations. **(A)** Total number of tumors, alterations, cancer types in the  
505 union of TCGA and AACR GENIE studies. Same gene double and different gene double  
506 mutations are found by the Mann-Whitney U test. Windrose plot showing the number of same  
507 gene double mutant (blue) tumors across 34 tissues (Oncotree) on the log-scale axis. Green  
508 portion represents the amount of tumors without any significant double mutation. **(B)** Tissue  
509 specificity of same gene dual mutations compared to their single mutant counterparts. X-axis  
510 shows the ratio of the number of tissues containing double and single mutant tumors in each  
511 gene. Y-axis shows the fraction of overall count of double mutant tumors to the single mutant  
512 ones. Smaller values along the x-axis indicates tissue specific same gene double mutations.  
513 Genes having cancer-specific double mutations are red and cancer-wide double mutations are in  
514 blue. **(C)** Composition of the double mutations based on known driver (D) and potential latent  
515 driver (d) labels in tumor suppressor genes and oncogenes where D is already known frequent  
516 driver mutations, d is relatively rare potential latent drivers. Fraction (%) of DD, Dd, dd type  
517 double mutations are significantly different between oncogenes and tumor suppressor genes. **(D)**  
518 Box plot showing passenger mutation load in tumor suppressor genes and oncogenes. The patient  
519 group carrying same gene double mutations on oncogenes have relatively smaller passenger  
520 mutation counts compared to the group carrying double mutation on tumor suppressor genes. **(E)**  
521 Tumor count distributions of known driver and potential latent driver mutations. Known driver  
522 mutations are observed more frequently than the potential latent driver mutations. **(F)** Grouped  
523 bar plot shows the fraction (%) of alterations in chemical properties of amino acids for  
524 oncogenes and tumor suppressor genes. Mutations on oncogenes mostly convert hydrophobic



525 residues to charged, and mutations on tumor suppressor genes usually convert charged residues  
526 to polar.

527

528 **Figure 2.** Same gene double mutations are specific to some tissues or cancer subtypes. Bubble  
529 plots show number (node size) and frequency (node color) of double-mutant tumors among  
530 gene-mutant tumors across different tissues and cancer subtypes (Oncotree). For the 35 genes  
531 with significant same gene double mutations, node size represents the number of patients  
532 carrying at least one doublet on a gene in a tissue or cancer type. **(A)** Presence of same gene  
533 double mutations across different cancer tissues where at least 3 tumors carry at least one same  
534 gene double mutation on one of the 35 genes. **(B)** Presence of different gene dual mutations  
535 across different cancer subtypes. The cancer subtypes where at least 5 tumors carry at least one  
536 double mutation are listed on the y-axis. **(C)** Representation of mutations in genes to compose a  
537 doublet as a circular diagram. Circumference of the circles divided into arcs proportional to the  
538 frequency of each mutated residue. The strips from one residue to another represents significant  
539 double mutations with size of strips indicating frequency of each double mutation.

540

541 **Figure 3.** A detailed analysis of PIK3CA double mutation profile, 3D structure and clinical  
542 implications. **(A)** Paired dot plot of the 46 double mutations on PIK3CA, and the number of  
543 tumors carrying them. Colors indicate type of a mutation, driver (purple), weak driver (orchid),  
544 strong latent driver (blue), weak latent driver (light blue). Drivers and weak drivers are known  
545 driver mutations with  $\geq 500$  and  $< 500$  harboring tumors respectively. Strong latent drivers and  
546 weak latent drivers are potential latent driver mutations carried by  $\geq 10$  and  $< 10$  tumors  
547 respectively. There are 3 *driver/driver*, 13 *weak driver/weak driver*, 5 *driver/strong latent driver*,

548 35 driver/weak driver. P104, E726 and M1004 have a potential to be strong latent drivers. **(B)**  
549 Presence of PIK3CA same gene dual mutations across different cancer tissues. Dots are scaled  
550 based on the number of tumor having double mutations, and color corresponds to the percentage  
551 of double mutant tumors among single mutants. **(C)** 3D structure of PIK3CA (PDB: 4OVV) with  
552 H1047, E726, E542, E545, R88, R93, P539. **(D)** Response of PIK3CA double mutant breast  
553 cancer cell lines to drugs in network representation. BT-20 (H1047/P539) and CAL148  
554 (H1047/D350) becomes sensitive to PI3K/MTOR pathway targeting drugs. **(E)** PIK3CA  
555 mutation doublets in breast cancer and the associated violin plot illustrating response to PI3Ky  
556 inhibitors. H1047/P539 double mutant tumor becomes more sensitive to PI3Ky inhibitors **(F)**  
557 Tumor volume change of single and double PIK3CA mutant xenografts without any treatment.  
558 There is a remarkable tumor increase in the double mutant xenograft. **(G)** Tumor volume  
559 comparison of the single and double mutant xenografts without any treatment and with BYL719  
560 (Alpelisib) treatment, the double mutant xenograft responds better to the PI3K $\alpha$  inhibitor drug.  
561 **(H)** Comparing tumor volume changes of the dual PIK3CA mutant xenografts without any  
562 treatment and with BYL719 and BYL719+LJM716 treatment. The tumor growth of the double  
563 mutant xenograft X-2524 is prominently slow when a combination therapy BYL719+LJM716 is  
564 applied compared to untreated and BYL719 treatment alone.

565  
566 **Figure 4.** Representation of double mutations in EGFR, BRAF, APC and PTEN. Each paired dot  
567 represents one double mutation. Dots are colored according to their type, driver (purple), weak  
568 driver (orchid), strong latent driver (blue), weak latent driver (sky blue). **(A)** Double mutations  
569 and corresponding number of mutated tumors of each component reveals that there are 5  
570 driver/driver, 5 weak driver/weak driver combinations and 1 weak driver/strong latent driver

571 combinations; V774 might be a strong latent driver. **(B)** Genes harboring 12 double mutations, 7  
572 are different combinations of strong latent drivers E317, E319, I710, L711, I714, E715 and  
573 L721, and the rest are V600 (driver) composed of a double mutation with the strong latent  
574 drivers. **(C)** PTEN carries 15 double mutations with only one potential strong latent driver  
575 (N323). **(D)** There are 25 double mutations on APC, R499, R564, E1408, S1465, T1487, T1556  
576 that are potential strong latent drivers.

577 **Figure 5.** A wider analysis of double mutations in cell lines and association of doublets to drug  
578 response for clinical implications. **(A)** Prevalence of the double mutations in tissues associated  
579 with cell lines. APC, EGFR, NRAS double mutant cell lines belong to bowel, lung and ovarian  
580 tissues respectively. There are two cell lines in bowel tissue carrying PTEN double mutations,  
581 and five cell lines in lymph tissue with TP53 double mutations. **(B)** EGFR mutation doublets in  
582 lung cancer cell lines and their response to drugs in network representation. Among eight drugs  
583 targeting EGFR and RTK pathways, EGFR<sup>L858/T790</sup> mutant cell line is only sensitive to Pelitinib,  
584 and it is unresponsive to the rest, although the EGFR<sup>L858</sup> mutant cell line is sensitive to all. **(C)**  
585 Representation of dual mutations in EGFR structure. **(D)** EGFR mutation doublets in lung cancer  
586 together with the violin plot that shows the response to RTK inhibitor in dual mutant and single  
587 mutant cell lines. More negative z-score means more sensitivity and more positive z-score means  
588 more resistance to the drug molecule **(E)** PTEN and **(F)** APC mutation doublets in colon cancer  
589 cell lines and their response to drugs in network representation.

## 590 **List of abbreviations**

591 PDX – Patient-derived xenograft

592 TCGA – The Cancer Genome Atlas

593 GENIE – Genomics Evidence Neoplasia Information Exchange

594 PDB – Protein Databank

595 **Declarations**

596 **Ethics approval and consent to participate.**

597 Not applicable

598 **Consent for publication**

599 Not applicable

600 **Availability of data and materials**

601 The results shown here are in whole or part based upon data generated by the TCGA Research  
602 Network: <https://www.cancer.gov/tcga>. The authors would like to acknowledge the American  
603 Association for Cancer Research and its financial and material support in the development of the  
604 AACR Project GENIE registry, as well as members of the consortium for their commitment to  
605 data sharing. Interpretations are the responsibility of the study authors. The cell line data  
606 underlying the results presented in the study are available from GDSC in  
607 <https://www.cancerrxgene.org/downloads>, Cell Model Passports in  
608 <https://cellmodelpassports.sanger.ac.uk/downloads>, and The Cancer Dependency Map project in  
609 <https://depmap.org/portal/download/>. The PDX data underlying the results presented in the study  
610 are available in Gao et al [38].

611 **Competing interests**

612 The authors declare that they have no competing interests.

613 **Funding**

614 This project has been funded in whole or in part with federal funds from the National Cancer  
615 Institute, National Institutes of Health, under contract HHSN261200800001E. The content of this  
616 publication does not necessarily reflect the views or policies of the Department of Health and  
617 Human Services, nor does mention of trade names, commercial products or organizations imply  
618 endorsement by the US Government. This Research was supported [in part] by the Intramural  
619 Research Program of the NIH, National Cancer Institute, Center for Cancer Research and the  
620 Intramural Research Program of the NIH Clinical Center. NT has received support from the  
621 Career Development Program of TUBITAK under the project number 117E192, UNESCO-  
622 L'Oreal National for Women in Science Fellowship and UNESCO-L'Oréal International Rising  
623 Talent Fellowship and TUBA-GEBIP.

624 **Authors' contributions**

625 Conceptualization: CJT, RN, NT

626 Data curation: BRY

627 Formal analysis: BRY, CJT, NT

628 Methodology: BRY, CJT, RN, NT

629 Project administration: NT

630 Supervision: NT

631 Visualization: BRY, NT

632 Writing – original draft: BRY, CJT, RN, NT

633 Writing – review and editing: BRY, CJT, RN, NT

634 **References**

635

636 1. Vogelstein B, Papadopoulos N, Velculescu VE, Zhou S, Diaz LA, Kinzler KW: **Cancer**  
637 **genome landscapes**. *science* 2013, **339**(6127):1546-1558.

638 2. McFarland CD, Korolev KS, Kryukov GV, Sunyaev SR, Mirny LA: **Impact of**  
639 **deleterious passenger mutations on cancer progression**. *Proceedings of the National*  
640 *Academy of Sciences* 2013, **110**(8):2910-2915.

641 3. Kotler E, Shani O, Goldfeld G, Lotan-Pompan M, Tarcic O, Gershoni A, Hopf TA,  
642 Marks DS, Oren M, Segal E: **A systematic p53 mutation library links differential**  
643 **functional impact to cancer mutation pattern and evolutionary conservation**.  
644 *Molecular cell* 2018, **71**(1):178-190. e178.

645 4. McFarland CD, Yaglom JA, Wojtkowiak JW, Scott JG, Morse DL, Sherman MY, Mirny  
646 LA: **The damaging effect of passenger mutations on cancer progression**. *Cancer*  
647 *research* 2017, **77**(18):4763-4772.

648 5. Nussinov R, Jang H, Tsai C-J, Cheng F: **Precision medicine review: rare driver**  
649 **mutations and their biophysical classification**. *Biophysical reviews* 2019, **11**(1):5-19.

650 6. Nussinov R, Tsai C-J: **‘Latent drivers’ expand the cancer mutational landscape**.  
651 *Current Opinion in Structural Biology* 2015, **32**:25-32.

652 7. Castro-Giner F, Ratcliffe P, Tomlinson I: **The mini-driver model of polygenic cancer**  
653 **evolution**. *Nature Reviews Cancer* 2015, **15**(11):680-685.

- 654 8. Sondka Z, Bamford S, Cole CG, Ward SA, Dunham I, Forbes SA: **The COSMIC**  
655 **Cancer Gene Census: describing genetic dysfunction across all human cancers.**  
656 *Nature Reviews Cancer* 2018, **18**(11):696-705.
- 657 9. An O, Dall'Olio GM, Mourikis TP, Ciccarelli FD: **NCG 5.0: updates of a manually**  
658 **curated repository of cancer genes and associated properties from cancer**  
659 **mutational screenings.** *Nucleic acids research* 2016, **44**(D1):D992-D999.
- 660 10. Tamborero D, Rubio-Perez C, Deu-Pons J, Schroeder MP, Vivancos A, Rovira A,  
661 Tusquets I, Albanell J, Rodon J, Tabernero J: **Cancer Genome Interpreter annotates**  
662 **the biological and clinical relevance of tumor alterations.** *Genome medicine* 2018,  
663 **10**(1):25.
- 664 11. Mularoni L, Sabarinathan R, Deu-Pons J, Gonzalez-Perez A, López-Bigas N:  
665 **OncodriveFML: a general framework to identify coding and non-coding regions**  
666 **with cancer driver mutations.** *Genome biology* 2016, **17**(1):1-13.
- 667 12. Arnedo-Pac C, Mularoni L, Muiños F, Gonzalez-Perez A, Lopez-Bigas N:  
668 **OncodriveCLUSTL: a sequence-based clustering method to identify cancer drivers.**  
669 *Bioinformatics* 2019, **35**(22):4788-4790.
- 670 13. Gundem G, Perez-Llamas C, Jene-Sanz A, Kedzierska A, Islam A, Deu-Pons J, Furney  
671 SJ, Lopez-Bigas N: **IntOGen: integration and data mining of multidimensional**  
672 **oncogenomic data.** *Nature methods* 2010, **7**(2):92-93.
- 673 14. Martínez-Jiménez F, Muiños F, Sentís I, Deu-Pons J, Reyes-Salazar I, Arnedo-Pac C,  
674 Mularoni L, Pich O, Bonet J, Kranas H: **A compendium of mutational cancer driver**  
675 **genes.** *Nature Reviews Cancer* 2020, **20**(10):555-572.

- 676 15. Bailey MH, Tokheim C, Porta-Pardo E, Sengupta S, Bertrand D, Weerasinghe A,  
677 Colaprico A, Wendl MC, Kim J, Reardon B: **Comprehensive characterization of**  
678 **cancer driver genes and mutations**. *Cell* 2018, **173**(2):371-385. e318.
- 679 16. Ramos AH, Lichtenstein L, Gupta M, Lawrence MS, Pugh TJ, Saksena G, Meyerson M,  
680 Getz G: **Oncotator: cancer variant annotation tool**. *Human mutation* 2015,  
681 **36**(4):E2423-E2429.
- 682 17. Chen S, He X, Li R, Duan X, Niu B: **HotSpot3D web server: an integrated resource**  
683 **for mutation analysis in protein 3D structures**. *Bioinformatics* 2020.
- 684 18. Niu B, Scott AD, Sengupta S, Bailey MH, Batra P, Ning J, Wyczalkowski MA, Liang W-  
685 W, Zhang Q, McLellan MD: **Protein-structure-guided discovery of functional**  
686 **mutations across 19 cancer types**. *Nature genetics* 2016, **48**(8):827-837.
- 687 19. Dincer C, Kaya T, Keskin O, Gursoy A, Tuncbag N: **3D spatial organization and**  
688 **network-guided comparison of mutation profiles in Glioblastoma reveals similarities**  
689 **across patients**. *PLoS computational biology* 2019, **15**(9):e1006789.
- 690 20. Evans P, Avey S, Kong Y, Krauthammer M: **Adjusting for background mutation**  
691 **frequency biases improves the identification of cancer driver genes**. *IEEE*  
692 *transactions on nanobioscience* 2013, **12**(3):150-157.
- 693 21. Nussinov R, Tsai C-J, Jang H: **Why are some driver mutations rare?** *Trends in*  
694 *pharmacological sciences* 2019, **40**(12):919-929.
- 695 22. Donehower LA, Soussi T, Korkut A, Liu Y, Schultz A, Cardenas M, Li X, Babur O, Hsu  
696 T-K, Lichtarge O: **Integrated analysis of TP53 gene and pathway alterations in the**  
697 **cancer genome atlas**. *Cell reports* 2019, **28**(5):1370-1384. e1375.



- 698 23. Bozic I, Antal T, Ohtsuki H, Carter H, Kim D, Chen S, Karchin R, Kinzler KW,  
699 Vogelstein B, Nowak MA: **Accumulation of driver and passenger mutations during**  
700 **tumor progression.** *Proceedings of the National Academy of Sciences* 2010,  
701 **107(43):18545-18550.**
- 702 24. Risques RA, Kennedy SR: **Aging and the rise of somatic cancer-associated mutations**  
703 **in normal tissues.** *PLoS genetics* 2018, **14(1):e1007108.**
- 704 25. Vasan N, Razavi P, Johnson JL, Shao H, Shah H, Antoine A, Ladewig E, Gorelick A, Lin  
705 T-Y, Toska E: **Double PIK3CA mutations in cis increase oncogenicity and sensitivity**  
706 **to PI3K $\alpha$  inhibitors.** *Science* 2019, **366(6466):714-723.**
- 707 26. Gorelick AN, Sánchez-Rivera FJ, Cai Y, Bielski CM, Biederstedt E, Jonsson P, Richards  
708 AL, Vasan N, Penson AV, Friedman ND: **Phase and context shape the function of**  
709 **composite oncogenic mutations.** *Nature* 2020:1-4.
- 710 27. Saito Y, Koya J, Araki M, Kogure Y, Shingaki S, Tabata M, McClure MB, Yoshifuji K,  
711 Matsumoto S, Isaka Y: **Landscape and function of multiple mutations within**  
712 **individual oncogenes.** *Nature* 2020:1-5.
- 713 28. Raimondi F, Inoue A, Kadji FM, Shuai N, Gonzalez J-C, Singh G, de la Vega AA,  
714 Sotillo R, Fischer B, Aoki J: **Rare, functional, somatic variants in gene families linked**  
715 **to cancer genes: GPCR signaling as a paradigm.** *Oncogene* 2019, **38(38):6491-6506.**
- 716 29. Lehner B: **Molecular mechanisms of epistasis within and between genes.** *Trends in*  
717 *Genetics* 2011, **27(8):323-331.**
- 718 30. van de Haar J, Canisius S, Michael KY, Voest EE, Wessels LF, Ideker T: **Identifying**  
719 **epistasis in cancer genomes: a delicate affair.** *Cell* 2019, **177(6):1375-1383.**

- 720 31. Liu J, Lichtenberg T, Hoadley K, Poisson L, Lazar A, Cherniack A, Kovatich A, Benz C,  
721 Levine D, Lee A: **Cancer Genome Atlas Research. 2018. An integrated TCGA pan-**  
722 *cancer clinical data resource to drive high-quality survival outcome analytics Cell,*  
723 **173**:400-416.
- 724 32. Consortium APG: **AACR Project GENIE: powering precision medicine through an**  
725 **international consortium. *Cancer discovery* 2017, 7(8):818-831.**
- 726 33. Cerami E, Gao J, Dogrusoz U, Gross BE, Sumer SO, Aksoy BA, Jacobsen A, Byrne CJ,  
727 Heuer ML, Larsson E: **The cBio cancer genomics portal: an open platform for**  
728 **exploring multidimensional cancer genomics data.** In.: AACR; 2012.
- 729 34. Goel MK, Khanna P, Kishore J: **Understanding survival analysis: Kaplan-Meier**  
730 **estimate. *International journal of Ayurveda research* 2010, 1(4):274.**
- 731 35. Gu Z, Eils R, Schlesner M: **Complex heatmaps reveal patterns and correlations in**  
732 **multidimensional genomic data. *Bioinformatics* 2016, 32(18):2847-2849.**
- 733 36. van der Meer D, Barthorpe S, Yang W, Lightfoot H, Hall C, Gilbert J, Francies HE,  
734 Garnett MJ: **Cell Model Passports—a hub for clinical, genetic and functional datasets**  
735 **of preclinical cancer models. *Nucleic acids research* 2019, 47(D1):D923-D929.**
- 736 37. Yang W, Soares J, Greninger P, Edelman EJ, Lightfoot H, Forbes S, Bindal N, Beare D,  
737 Smith JA, Thompson IR: **Genomics of Drug Sensitivity in Cancer (GDSC): a resource**  
738 **for therapeutic biomarker discovery in cancer cells. *Nucleic acids research* 2012,**  
739 **41(D1):D955-D961.**
- 740 38. Gao H, Korn JM, Ferretti S, Monahan JE, Wang Y, Singh M, Zhang C, Schnell C, Yang  
741 G, Zhang Y: **High-throughput screening using patient-derived tumor xenografts to**  
742 **predict clinical trial drug response. *Nature medicine* 2015, 21(11):1318-1325.**

- 743 39. Chen Z, Feng J, Saldivar J, Gu D, Bockholt A, Sommer S: **EGFR somatic doublets in**  
744 **lung cancer are frequent and generally arise from a pair of driver mutations**  
745 **uncommonly seen as singlet mutations: one-third of doublets occur at five pairs of**  
746 **amino acids.** *Oncogene* 2008, **27**(31):4336-4343.
- 747 40. Gao J, Chang MT, Johnsen HC, Gao SP, Sylvester BE, Sumer SO, Zhang H, Solit DB,  
748 Taylor BS, Schultz N: **3D clusters of somatic mutations in cancer reveal numerous**  
749 **rare mutations as functional targets.** *Genome medicine* 2017, **9**(1):4.
- 750 41. Xu X, Zhao J, Xu Z, Peng B, Huang Q, Arnold E, Ding J: **Structures of human**  
751 **cytosolic NADP-dependent isocitrate dehydrogenase reveal a novel self-regulatory**  
752 **mechanism of activity.** *Journal of Biological Chemistry* 2004, **279**(32):33946-33957.
- 753 42. Hobbs GA, Der CJ: **RAS mutations are not created equal.** *Cancer discovery* 2019,  
754 **9**(6):696-698.
- 755 43. Poulin EJ, Bera AK, Lu J, Lin Y-J, Strasser SD, Paulo JA, Huang TQ, Morales C, Yan  
756 W, Cook J: **Tissue-specific oncogenic activity of KRASA146T.** *Cancer discovery* 2019,  
757 **9**(6):738-755.
- 758 44. Chin CV, Antony J, Ketharnathan S, Labudina A, Gimenez G, Parsons KM, He J, George  
759 AJ, Pallota MM, Musio A: **Cohesin mutations are synthetic lethal with stimulation of**  
760 **WNT signaling.** *Elife* 2020, **9**:e61405.
- 761 45. Zhang M, Jang H, Nussinov R: **PI3K Driver Mutations: A Biophysical Membrane-**  
762 **Centric Perspective.** *Cancer Research* 2020.
- 763 46. Zhang M, Jang H, Nussinov R: **Structural Features that Distinguish Inactive and**  
764 **Active PI3K Lipid Kinases.** *Journal of molecular biology* 2020, **432**(22):5849-5859.

- 765 47. Zhang M, Jang H, Nussinov R: **The structural basis for Ras activation of PI3K $\alpha$  lipid**  
766 **kinase**. *Physical Chemistry Chemical Physics* 2019, **21**(22):12021-12028.
- 767 48. Rodrigues CH, Pires DE, Ascher DB: **DynaMut: predicting the impact of mutations**  
768 **on protein conformation, flexibility and stability**. *Nucleic acids research* 2018,  
769 **46**(W1):W350-W355.
- 770 49. Liu X, Lu S, Song K, Shen Q, Ni D, Li Q, He X, Zhang H, Wang Q, Chen Y:  
771 **Unraveling allosteric landscapes of allosterome with ASD**. *Nucleic acids research*  
772 2020, **48**(D1):D394-D401.
- 773 50. Shannon P, Markiel A, Ozier O, Baliga NS, Wang JT, Ramage D, Amin N, Schwikowski  
774 B, Ideker T: **Cytoscape: a software environment for integrated models of**  
775 **biomolecular interaction networks**. *Genome research* 2003, **13**(11):2498-2504.
- 776 51. Yao Z, Yaeger R, Rodrik-Outmezguine VS, Tao A, Torres NM, Chang MT, Drost M,  
777 Zhao H, Cecchi F, Hembrough T: **Tumours with class 3 BRAF mutants are sensitive**  
778 **to the inhibition of activated RAS**. *Nature* 2017, **548**(7666):234-238.
- 779 52. Romero-Pérez L, Surdez D, Brunet E, Delattre O, Grünewald TG: **STAG mutations in**  
780 **cancer**. *Trends in Cancer* 2019, **5**(8):506-520.
- 781 53. Hill VK, Kim J-S, Waldman T: **Cohesin mutations in human cancer**. *Biochimica et*  
782 *Biophysica Acta (BBA)-Reviews on Cancer* 2016, **1866**(1):1-11.
- 783 54. Ding S, Diep J, Feng N, Ren L, Li B, Ooi YS, Wang X, Brulois KF, Yasukawa LL, Li X:  
784 **STAG2 deficiency induces interferon responses via cGAS-STING pathway and**  
785 **restricts virus infection**. *Nature communications* 2018, **9**(1):1-8.

786

**A**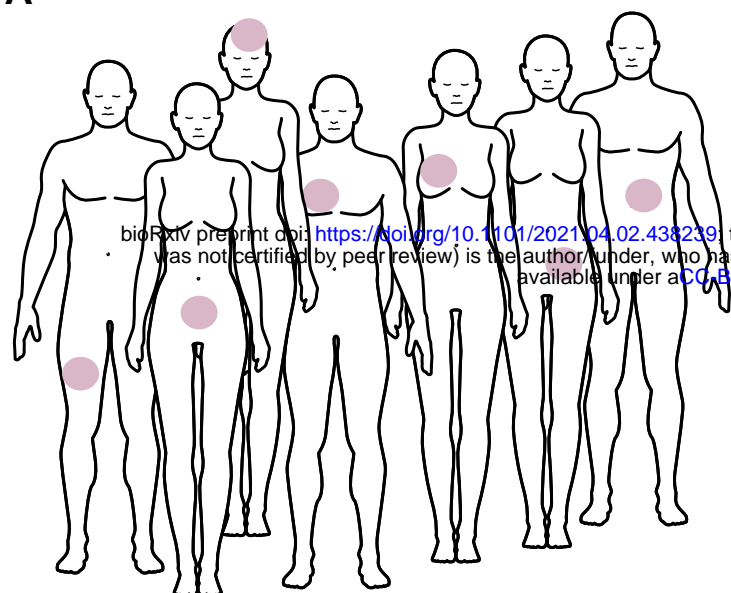

78837 Tumor Samples  
671 Cancer Types, 34 Tissues  
1638191 Alterations

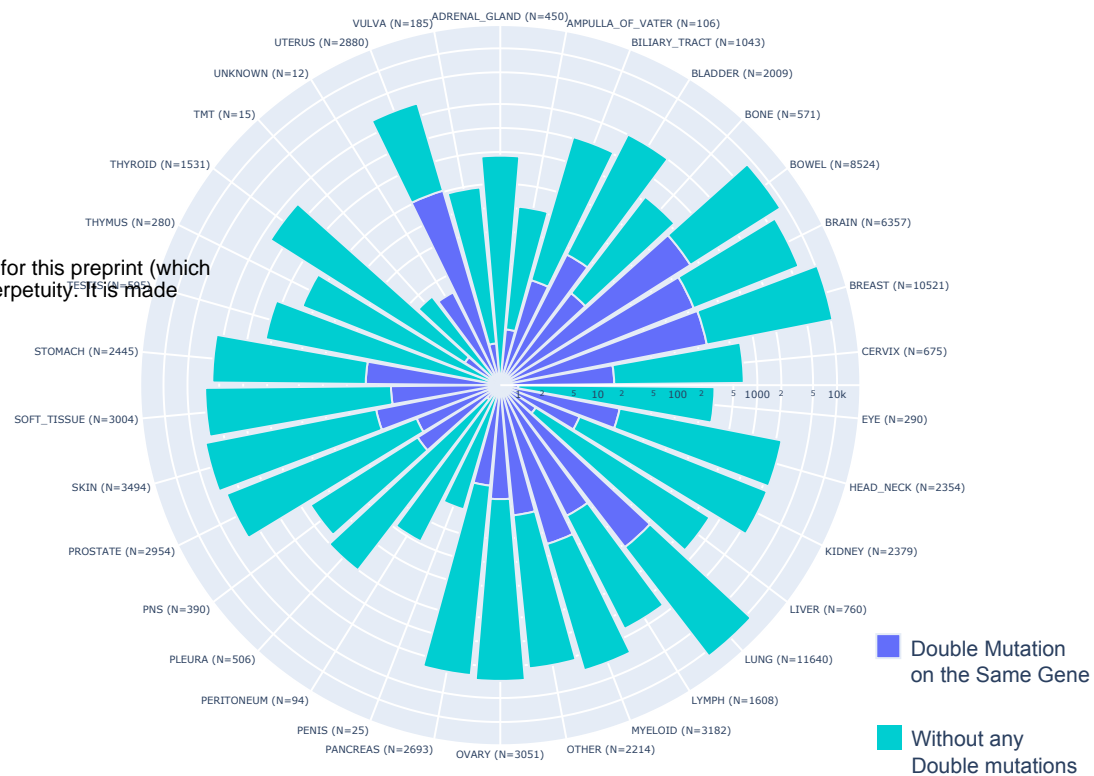**B**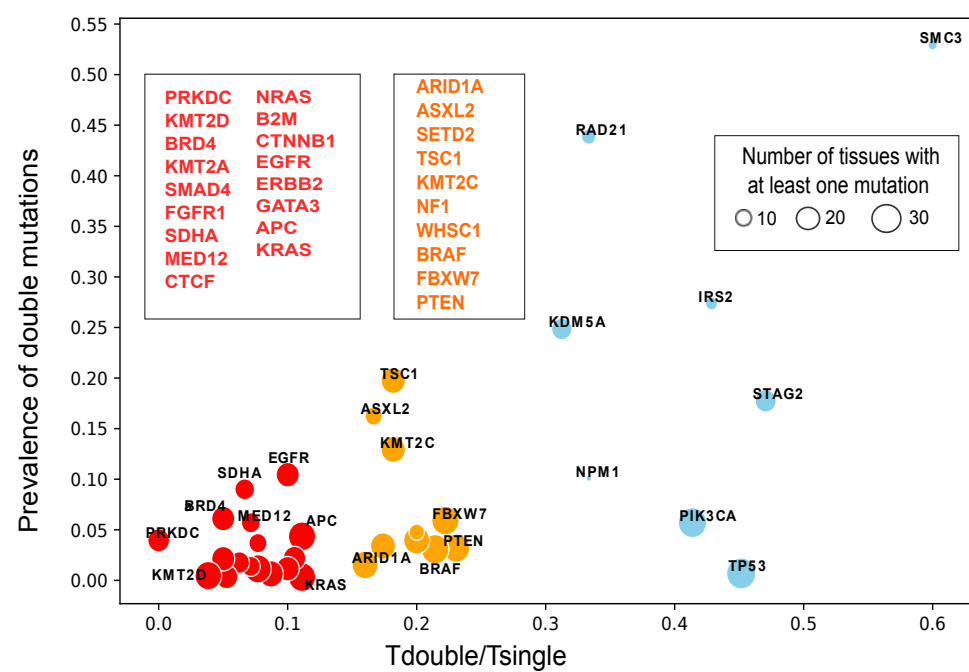**C**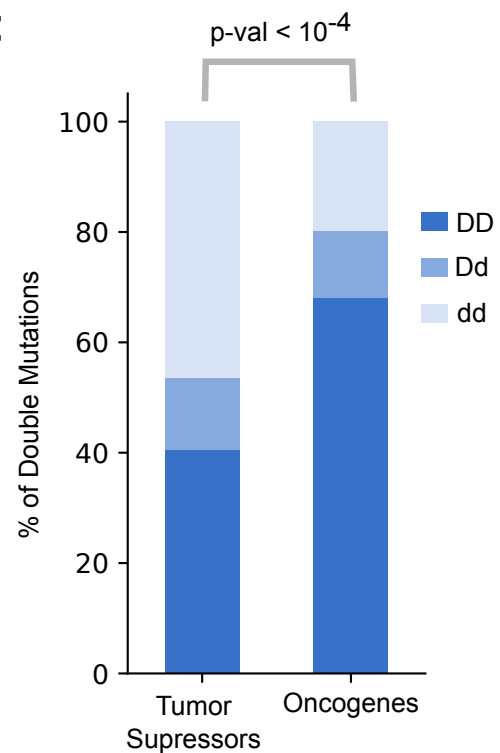**D**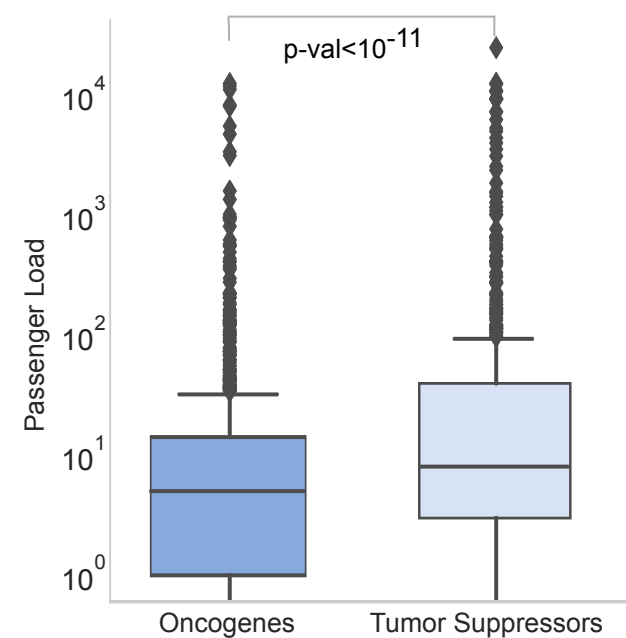**E**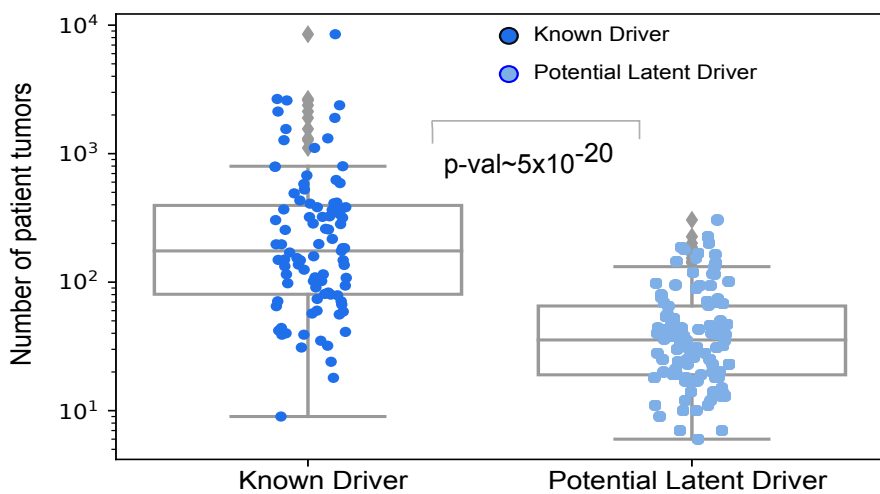**F**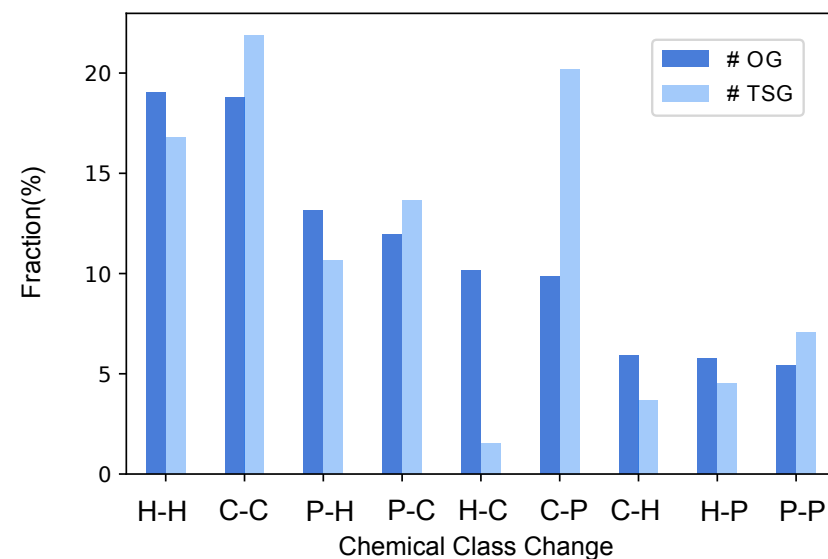



A

Tissues (At least 3 patients have a double mutation)

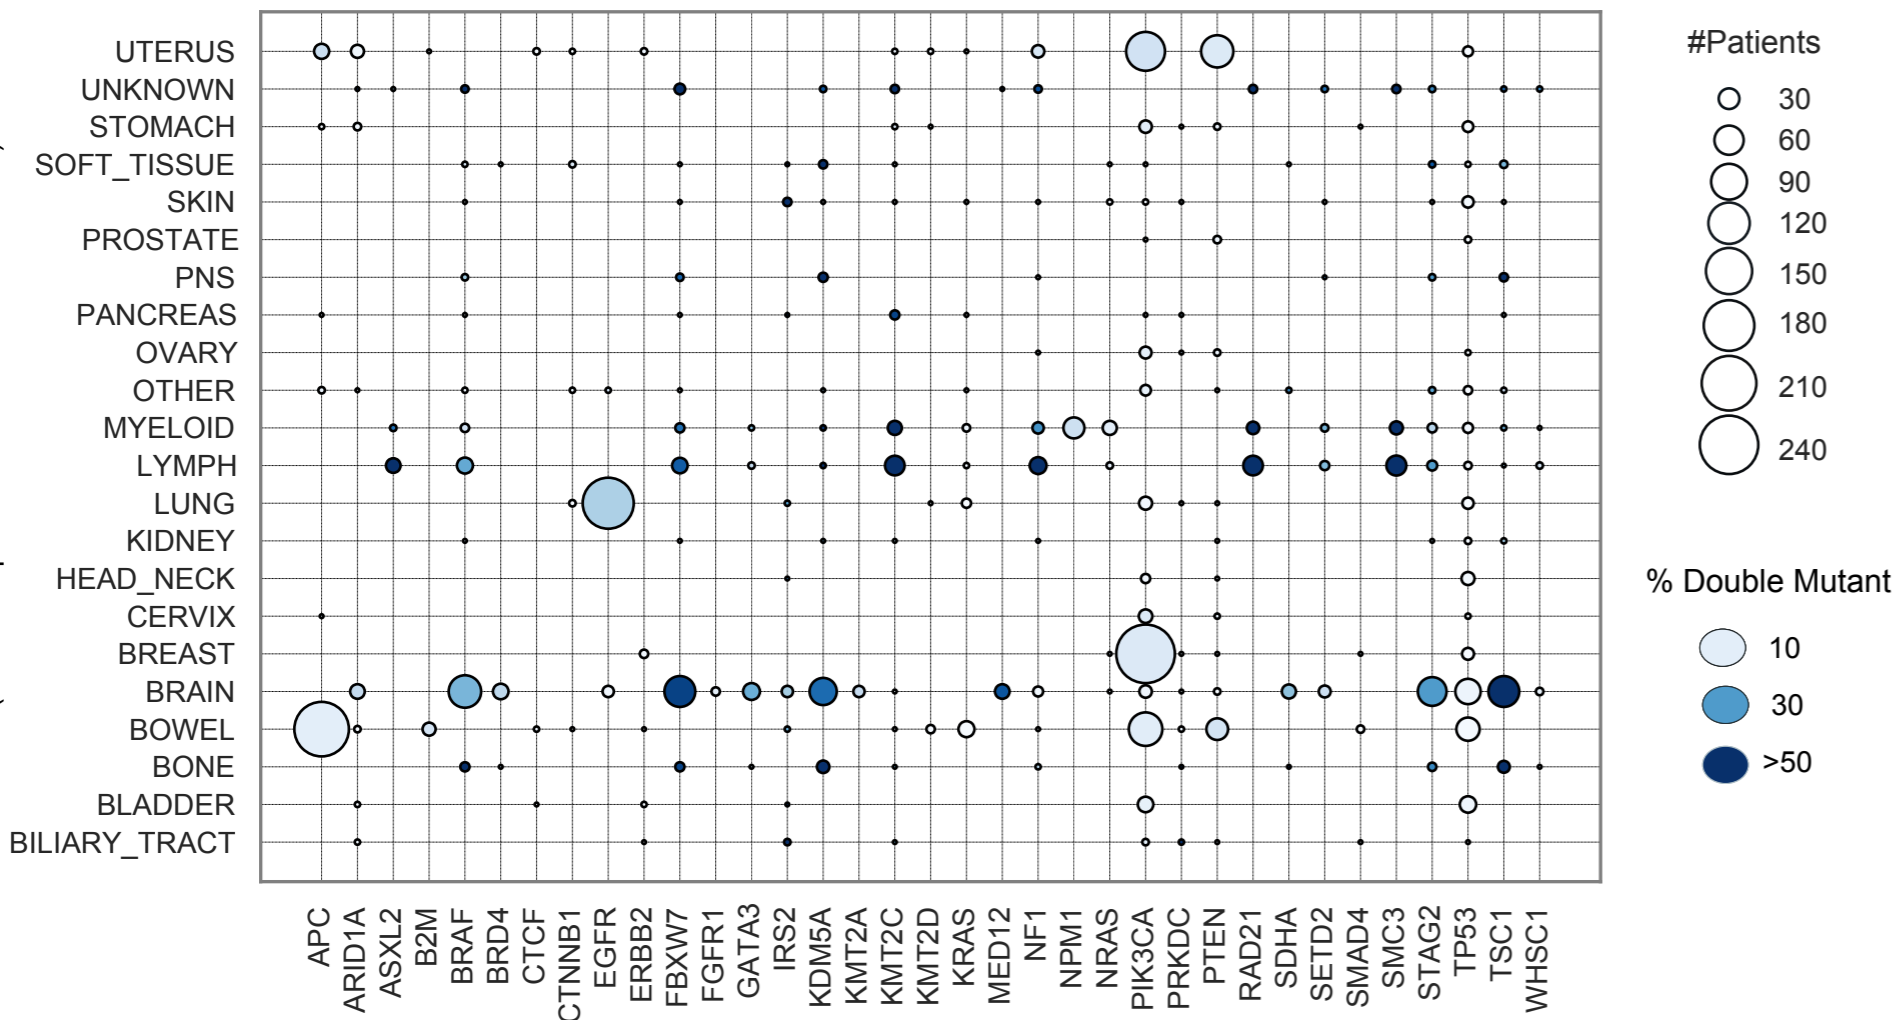

B

Cancer subtypes (At least 5 patients have a double mutation)

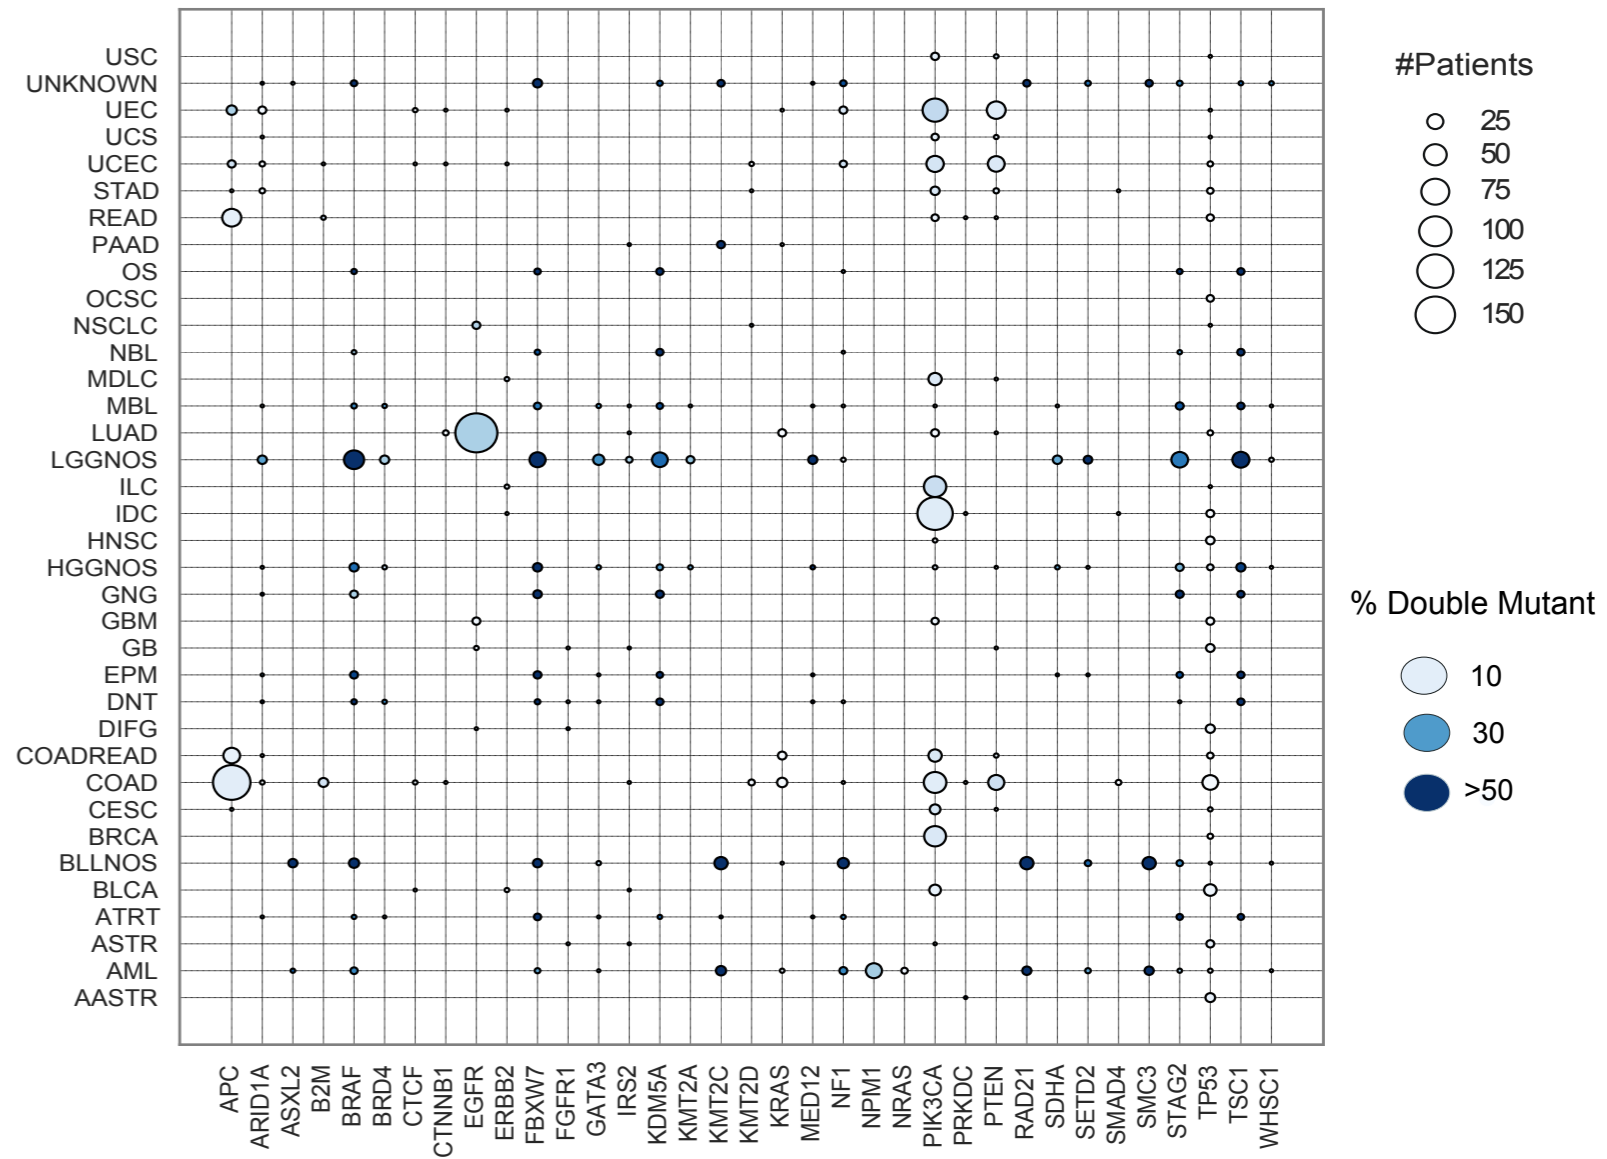

C

Genes with significant double mutations

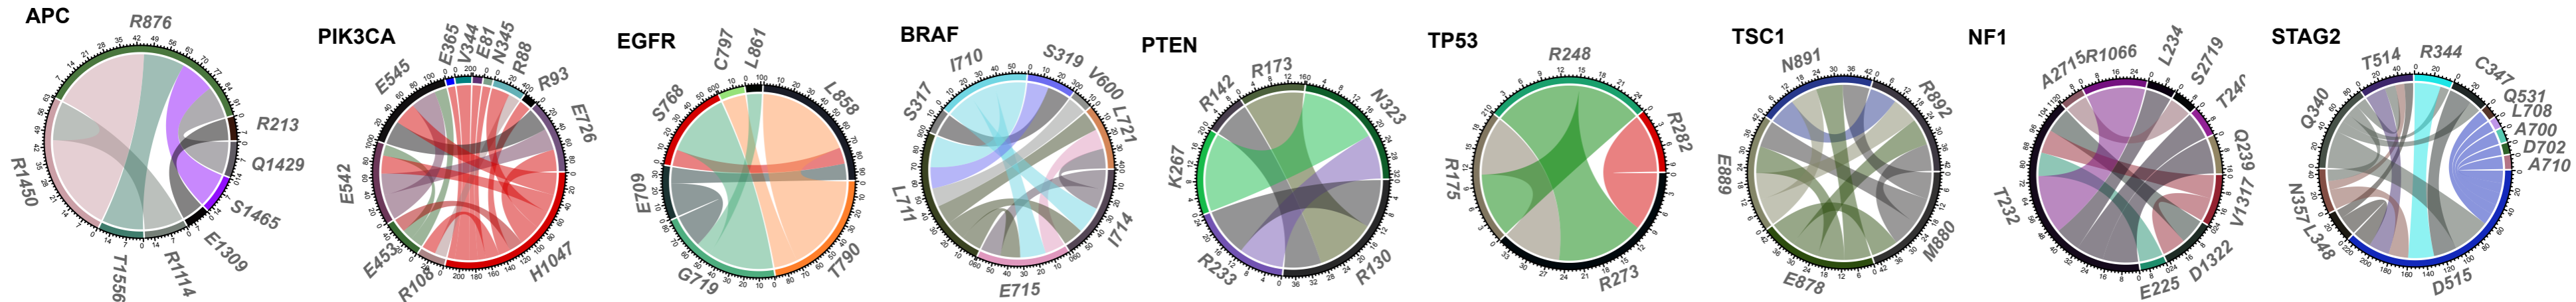

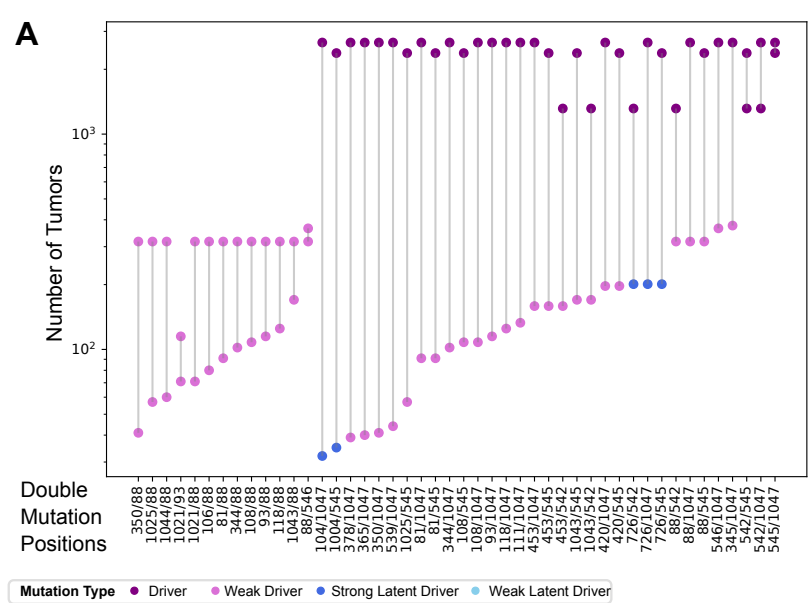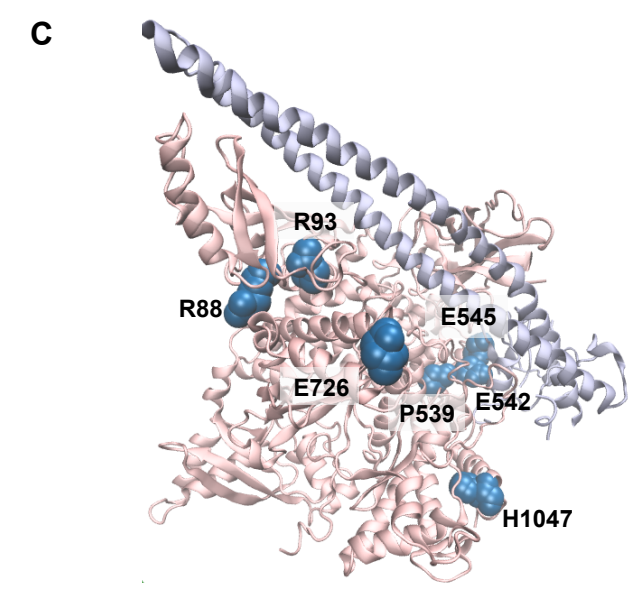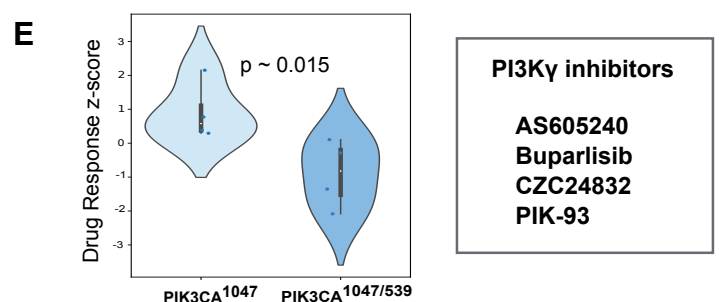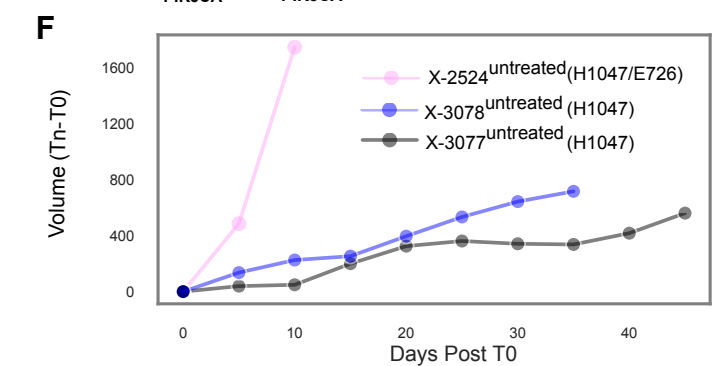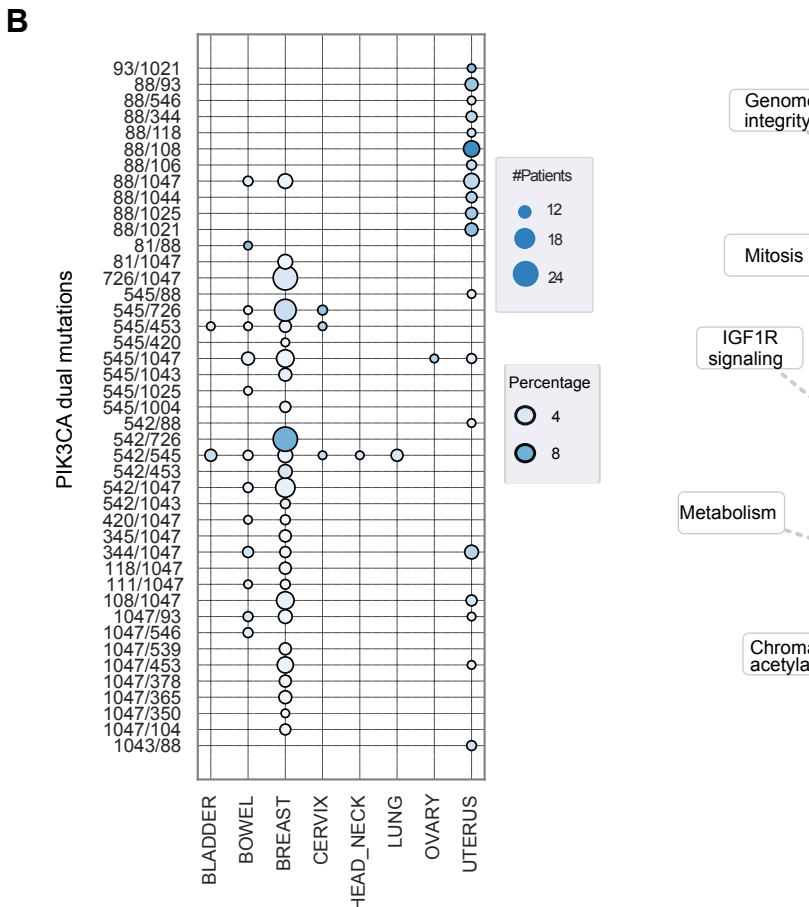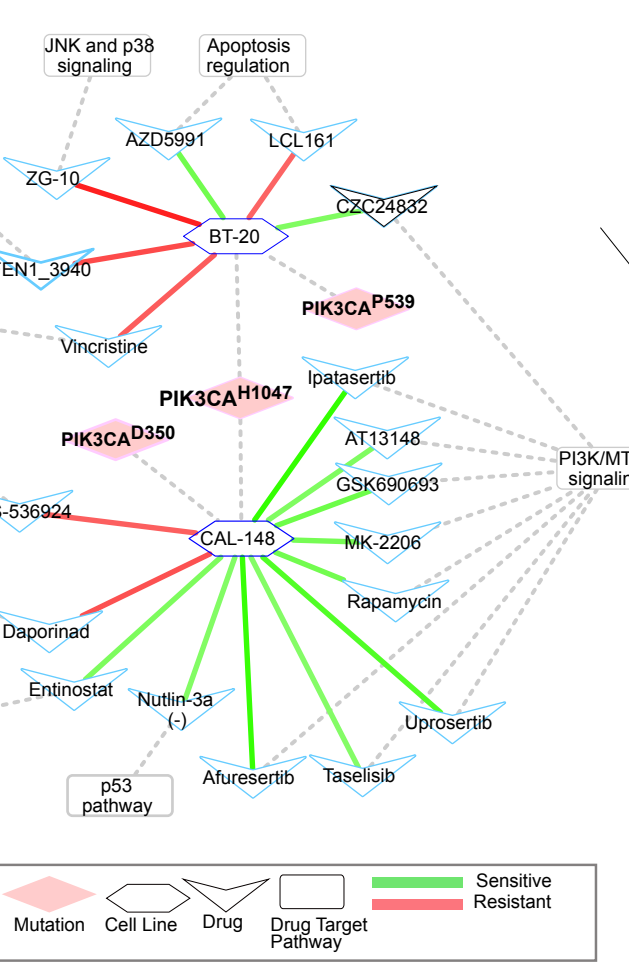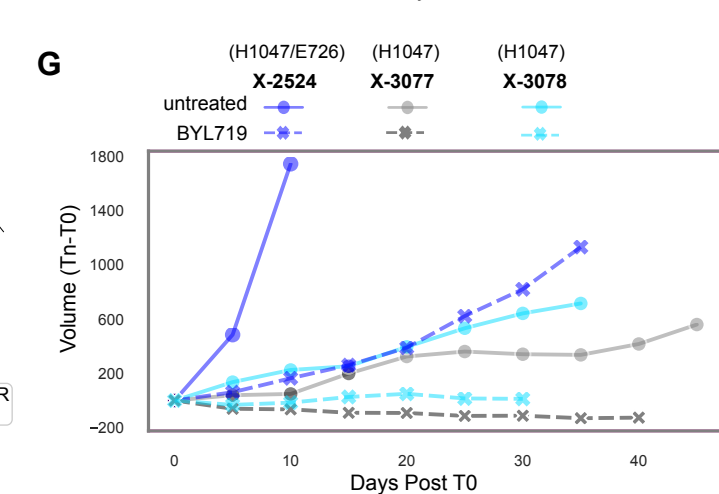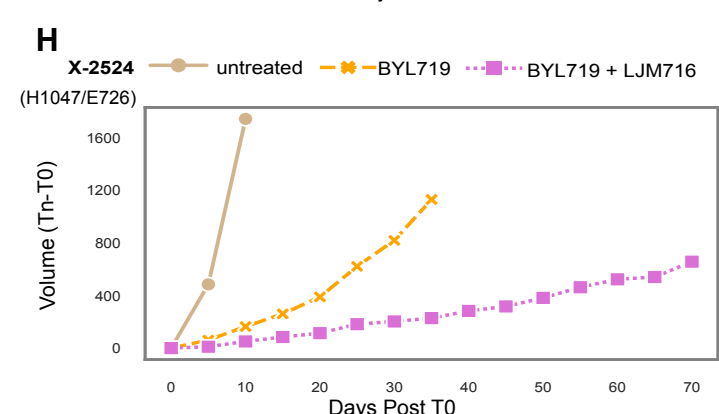

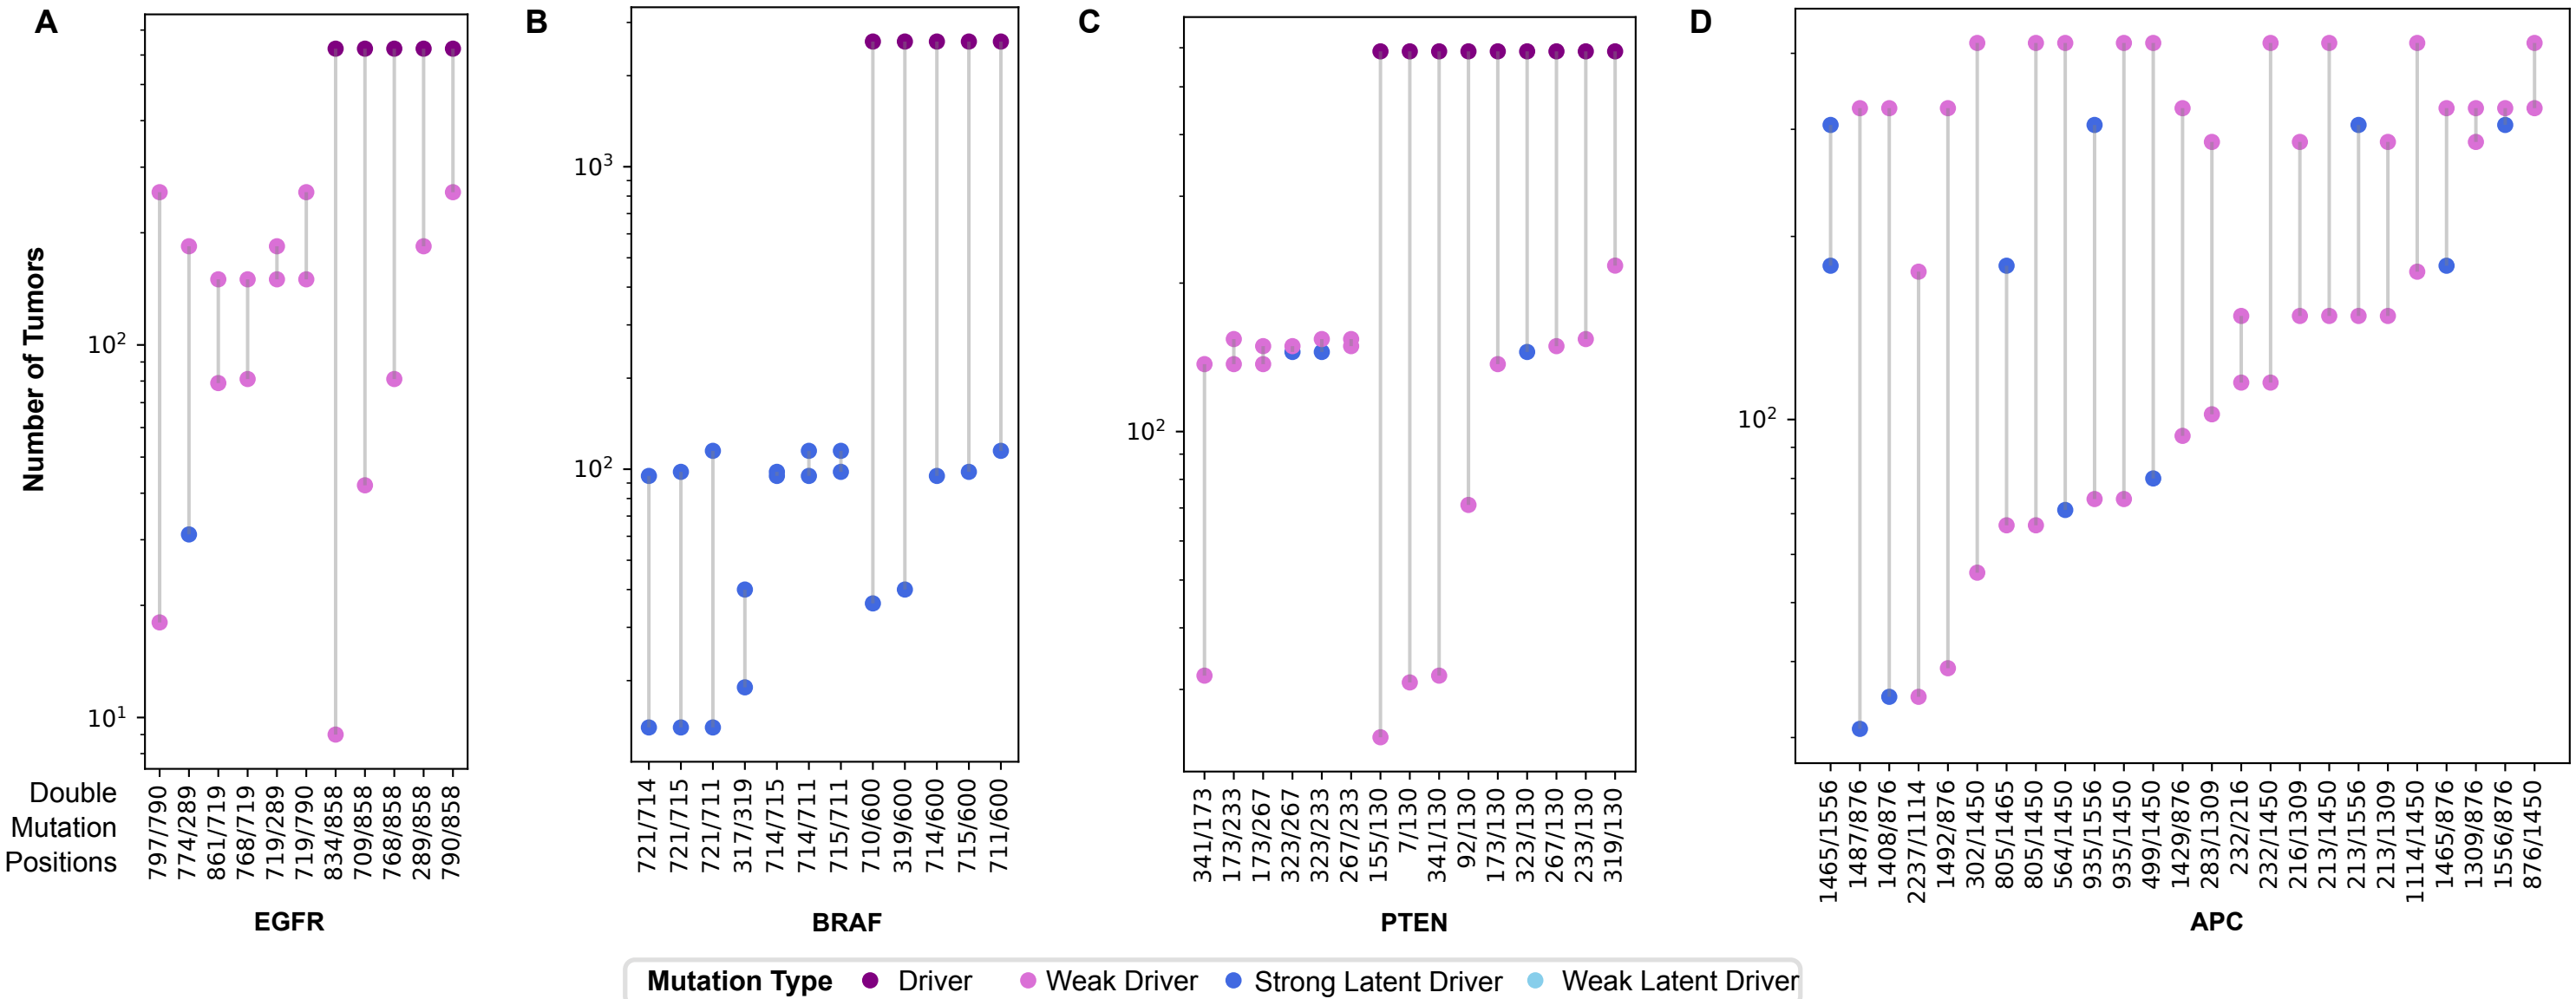



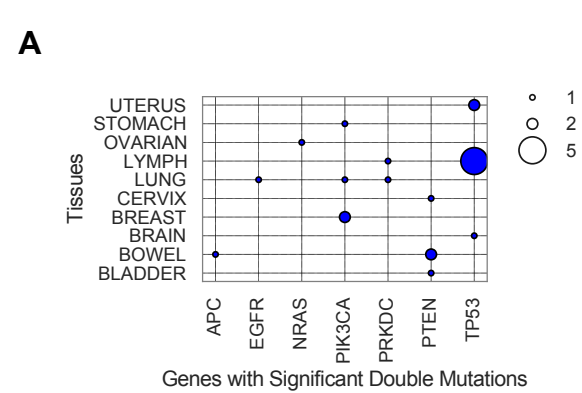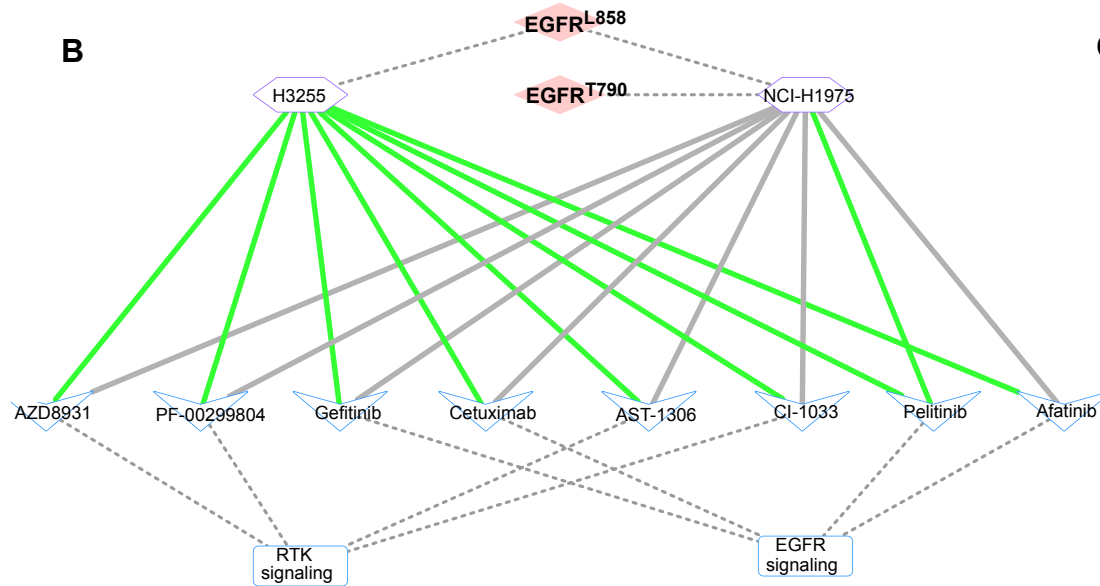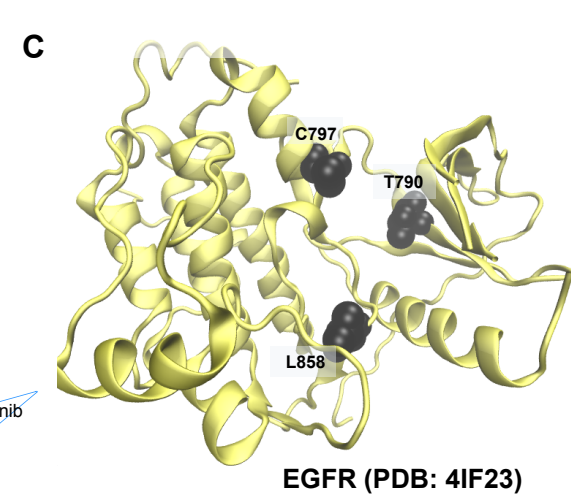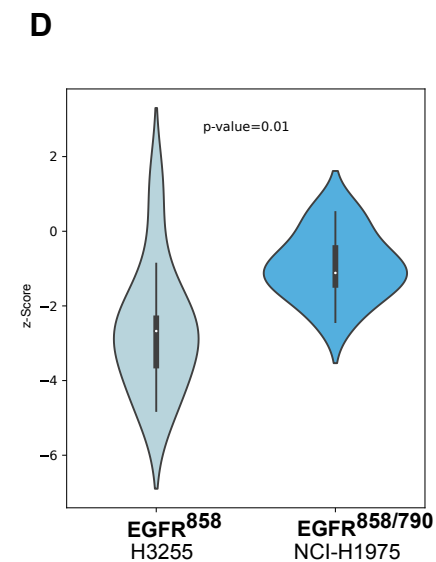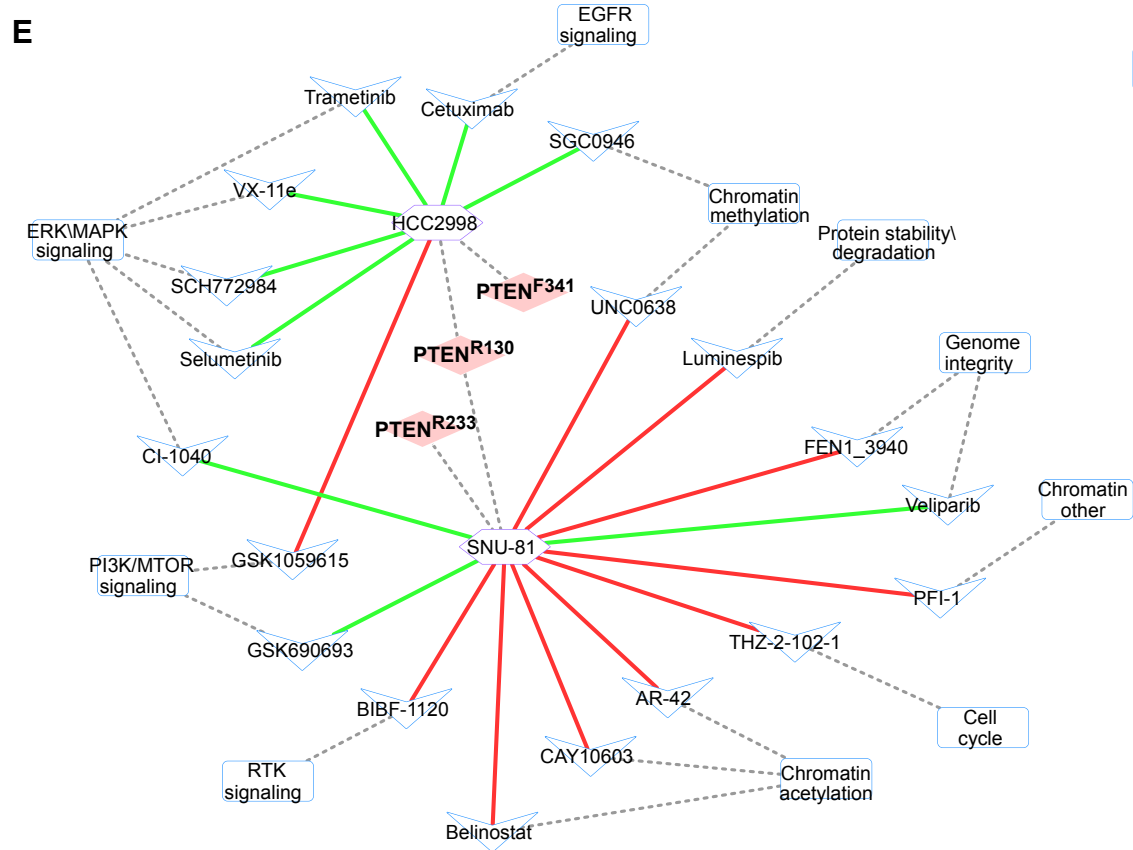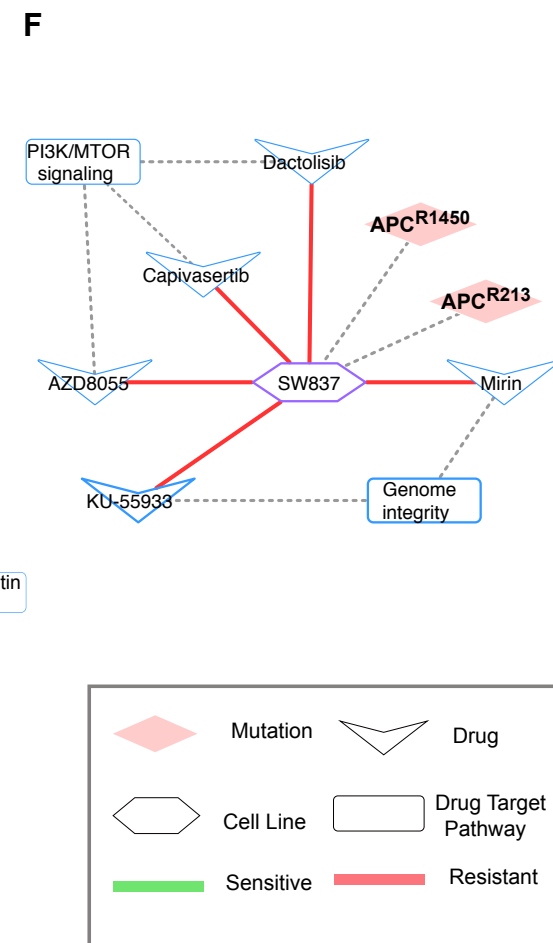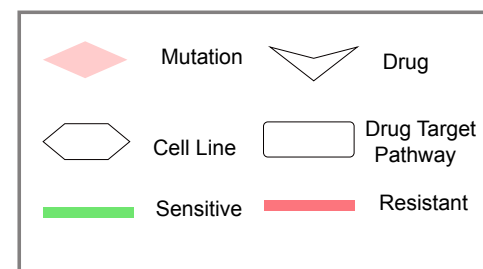

## 1 **Supplementary Text**

### 2 **Annotation of Double Mutations**

3 We used domain and gene ontology (GO) information from InterPro, a consortium database  
4 collecting information from member databases, to annotate same gene double mutations  
5 (<https://www.ebi.ac.uk/interpro/>). Therefore a mutation position may match with more than one  
6 InterPro id, when this is the case we preferred Pfam annotation. If a mutation does not match  
7 with any Interpro id, we labelled it as “No\_Domain\_Info”. We mapped the Interpro ID’s to GO  
8 Annotations related to biological process, molecular function and cellular component categories.  
9 Usually an Interpro ID matches with more than one GO annotation. We constructed binary  
10 combinations of these domains for each component of a double mutation and counted the double  
11 mutations related to domain annotation combinations (similar procedure was conducted for GO  
12 annotations).

13 To find out spatial closeness of same gene double mutations we use 3DHotspots [1] which  
14 identifies statistically significant mutations clustering in 3D protein structures. There are 943  
15 clusters of 504 different genes. If two mutated residues that are containing a dual mutation  
16 belong to the same cluster, we consider this same gene dual mutation components are in close  
17 proximity. We used Interactome Insider to identify if the components of either same gene or  
18 different gene double are located in the same interface [2]. Besides the experimental data in PDB  
19 and predicted data in Interactome3D, it also contains the predicted interfaces with their in-house  
20 method. We used EnrichR to find the pathway annotation of the genes having co-occurring  
21 mutations [3].

22 We matched the sequence position of each component of the same gene doublets to their  
23 InterPro domain, if available [4]. As a result, we mapped 113 out of 228 doublets to at least one  
24 Interpro domain. In case of more than one matching domain, we picked the Pfam original one, if  
25 available. Among them, only one component has domain information for 22 double mutations. In  
26 96 doublets, both components have no domain information. We obtained a total of 19 InterPro  
27 domains. Mutations without any domain information are labeled ‘No\_Domain\_Info’ (this label  
28 covers cases whether the mutation position does not match with any domain or it belongs to  
29 loop, hinge regions). As shown in Figure S1A, a large portion of the mutations is in a region with  
30 domain annotation. Both components of 56 dual mutations are in the same domain. Doublets  
31 with domain information are either located in flexible or hinge or disordered regions or located  
32 in different domains.

33 A similar approach is applied to find GO molecular function information for partner mutations of  
34 doublets (Figure S1B). Both components of 57 dual mutations match with at least one GO  
35 molecular function annotation. Neither component of 151 dual mutations matches any GO  
36 Annotation. In the remaining 20 dual mutations, only one component matches with a GO  
37 annotation. Protein kinase activity and ATP binding are two molecular functions that are the  
38 most frequent annotations covering ~15% of the same gene dual mutations having GO  
39 annotation.

#### 40 **Alterations in Chemical Properties of amino acids**

41 In order to classify alterations with respect to chemical classes of amino acids before and after  
42 mutations, we prepared a file containing unique rows as follows “patient barcode| gene | residue  
43 number | AA before mutation | AA after mutation”. We excluded the cases where the final

44 amino acid is a stop codon. We calculated the fraction of chemical alterations on 2189 oncogene  
45 and 2262 tumor suppressor alterations among all oncogene and tumor suppressor alterations  
46 respectively (determined with respect to mutation positions). The 9 categories we evaluated in  
47 our analysis are Polar-Hydrophobic, Charged-Polar, Hydrophobic-Hydrophobic, Hydrophobic-  
48 Polar, Hydrophobic-Charged, Polar-Charged, Polar-Polar, Charged-Hydrophobic, Charged-  
49 Charged.

### 50 *PIK3CA Stability Analysis via Dynamut Tool*

51 Using the inactive state (PDB id: 4OVV) we calculated the folding free energy ( $\Delta\Delta G$ ) upon  
52 mutation using DynaMut [5] to assess the impact of single and double mutations on PIK3CA  
53 stability. Unsurprisingly, considering their diverse mechanism of action no clear trend is  
54 observed (Figure S8). For example, H1047R is a strong driver that promotes interaction with the  
55 membrane. Its destabilization impact is minor ( $\Delta\Delta G \approx -0.5$  kcal/mol). The impact of weak drivers  
56 R88Q and R93W is somewhat stronger ( $\Delta\Delta G \approx -1.5$  kcal/mol and  $\Delta\Delta G \approx -1$  kcal/mol,  
57 respectively). The effect of allosteric mutation D539R is also minor ( $\Delta\Delta G \approx -0.6$  kcal/mol).  
58 Another strong driver E542K ( $\Delta\Delta G \approx 0.7$  kcal/mol), stabilizes the protein like the weak drivers  
59 D350G ( $\Delta\Delta G \approx 0.5$  kcal/mol) and E453Q ( $\Delta\Delta G \approx 0.3$  kcal/mol). The most prominent stability  
60 changes occur when the strong driver H1047R cooperates with the allosteric mutation P539R  
61 ( $\Delta\Delta G \approx -2.3$  kcal/mol) and the minor mutation P104L ( $\Delta\Delta G \approx -2.5$  kcal/mol). These two dual  
62 mutations H1047R/P539R and H1047R/P104L destabilize the protein as do T1025A/R88Q  
63 ( $\Delta\Delta G \approx 0.7$  kcal/mol) while T1025A and R88Q have a destabilizing effect.

64

65

## 66 Supplementary figures

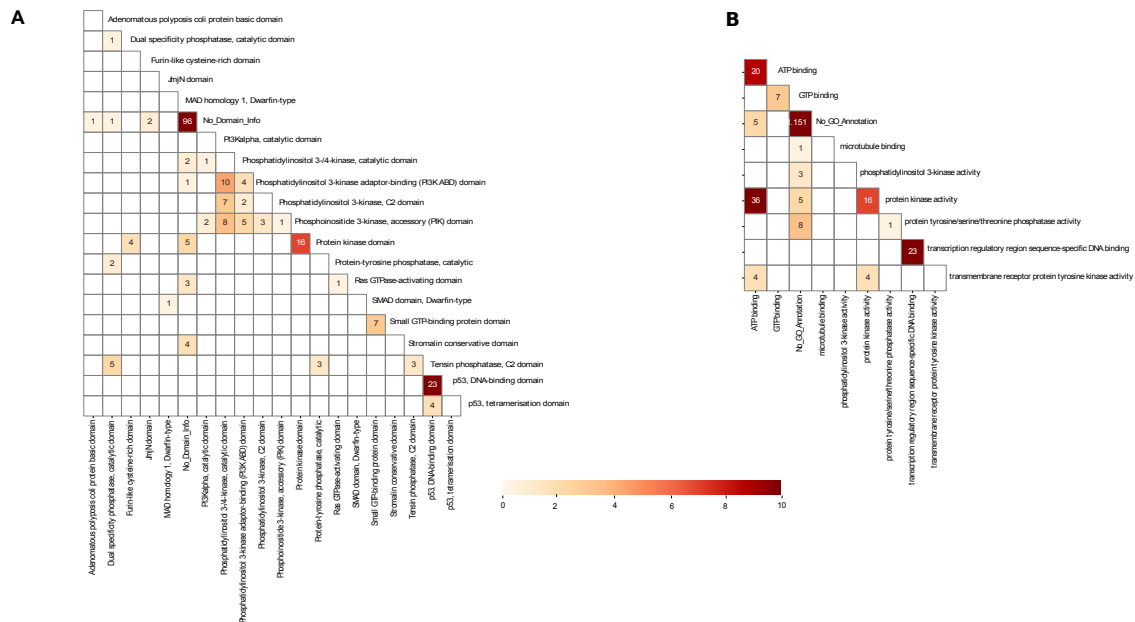

67

68 **Figure S1. (A)** Domain annotation and **(B)** GO molecular function annotation of the mutations  
 69 in same gene dual mutations. The numbers in the squares correspond to the number of same gene  
 70 dual mutations where constituents are from the domains on the x and y axes.

71

72

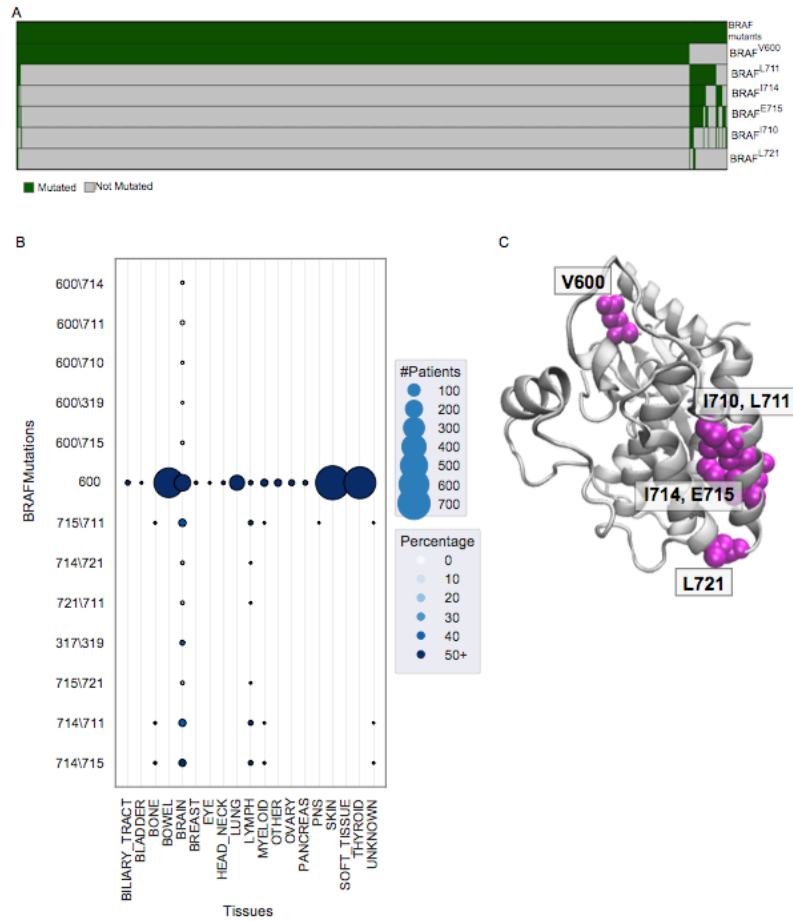

73

74 **Figure S2 : (A)** Oncoprint of frequent BRAF dual mutation constituents. **(B)** Tissue prevalence

75 of dual mutations of BRAF. **(C)** Mutations mapped to 3D structure of BRAF (PDB: 4G9R,

76 Chain: B)

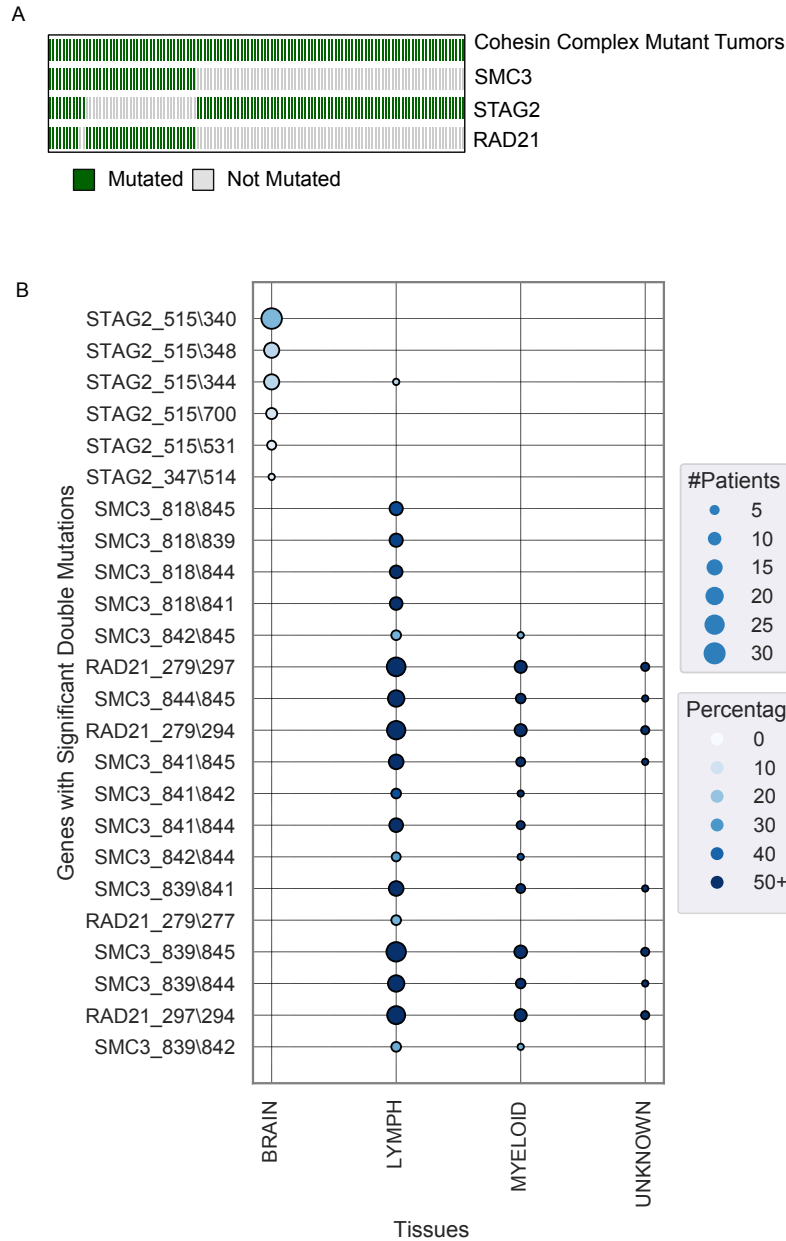

77

78

79 **Figure S3 : (A)** Oncoprint of Cohesin complex subunits STAG2, RAD21, SMC3. **(B)** Tissue

80 prevalence of dual mutations of STAG2, RAD21, SMC3.

81

82

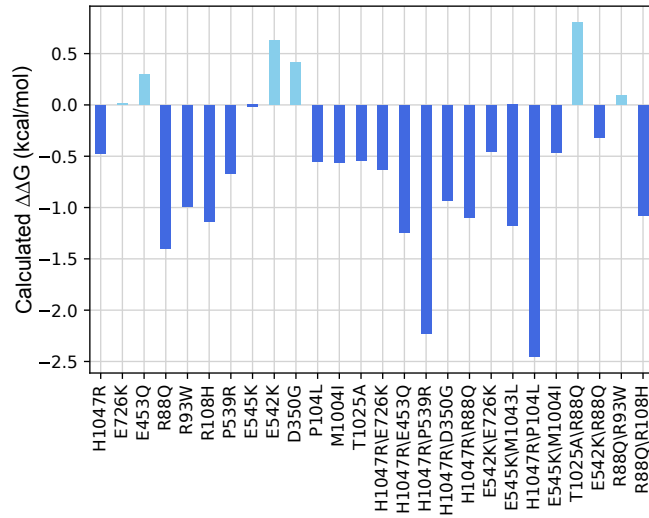

83

84

85

86 **Figure S4:** Predicted  $\Delta\Delta G$  values for single and dual mutations of PIK3CA calculated with

87 Dynamut web server (PDB id: 4OVV).

88

89

90

91

92

93



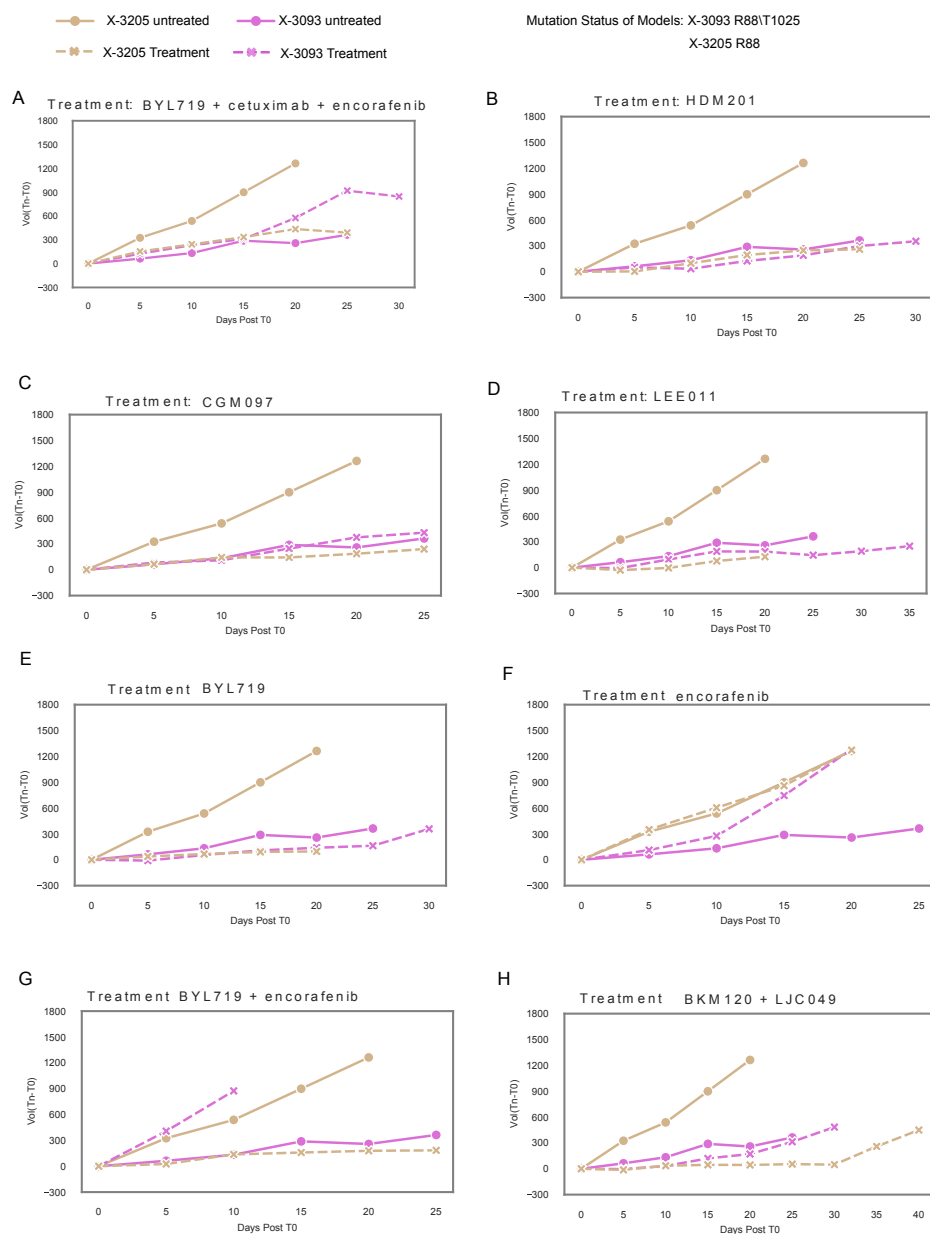

94  
95  
96  
97 **Figure S5.** PIK3CA R88/T1025 mutant xenograft (X-3093, BRCA) volume change compared  
98 to single R88 mutant xenograft (X-3205, BRCA) for different drug treatments. x-axis shows  
99 treatment days, y-axis shows volume difference Volume(Day=n)-Volume(Day=0). Treatment  
100 with the drugs/drug combinations **(A)** BYL719+cetuximab+encorafenib combination. **(B)**

101 HDM201 (Siremadlin). (C) CGM097. (D) LEE011 (Ribociclib) (E) BYL719 (Alpelisib) (F)  
 102 Encorafenib (G) BYL719+Encorafenib  
 103 (H) BKM120+LJC049  
 104

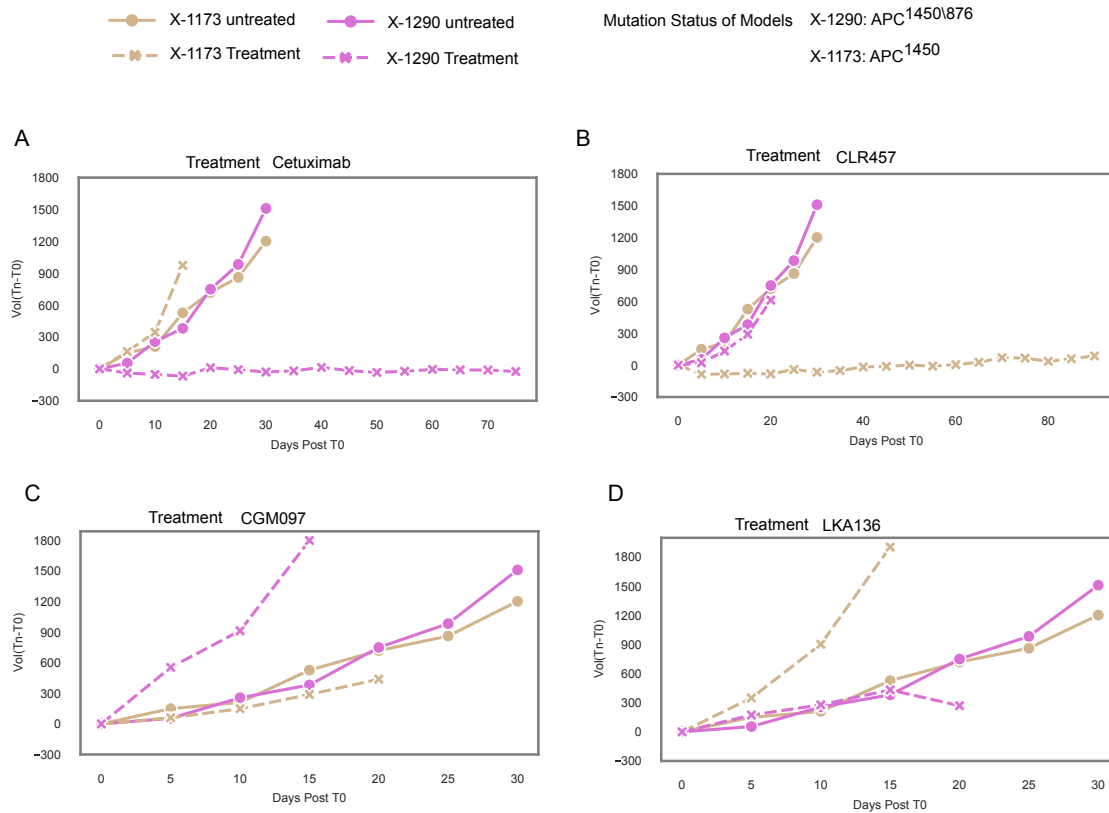

105  
 106  
 107  
 108  
 109 **Figure S6.** APC R1450\R876 mutant xenograft (X-1290, CRC) volume change compared to  
 110 single R1450 mutant xenograft (X-1173, CRC) for different drug treatments. x-axis shows  
 111 treatment days, y-axis shows volume difference Volume(Day=n)-Volume(Day=0). Treatment  
 112 with the drugs (A) Cetuximab (B) CLR457 (C) CGM097 (D) LKA136.

113

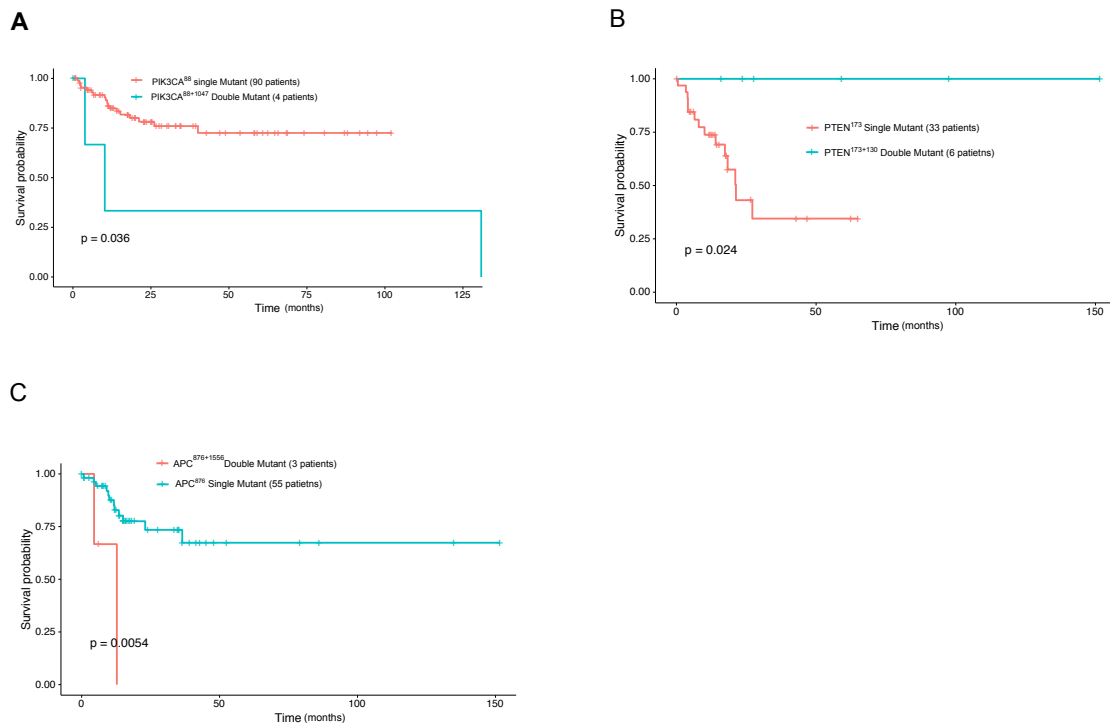

114

115 **Figure S7.** Kaplan-Meier survival analysis comparing single and double mutant patient groups.

116 P-values are calculated with logrank test. **(A)** PIK3CA<sup>88</sup> and PIK3CA<sup>88+1047</sup>

117 **(B)** PTEN<sup>173</sup> and PTEN<sup>173+130</sup> **(C)** APC<sup>876</sup> and APC<sup>876+1556</sup>

118

119

## 120 Supplementary References

- 121 1. Chen S, He X, Li R, Duan X, Niu B: **HotSpot3D web server: an integrated resource**  
122 **for mutation analysis in protein 3D structures.** *Bioinformatics* 2020.

- 123 2. Meyer MJ, Beltrán JF, Liang S, Fragoza R, Rumack A, Liang J, Wei X, Yu H:  
124 **Interactome INSIDER: a structural interactome browser for genomic studies.**  
125 *Nature methods* 2018, **15**(2):107.
- 126 3. Kuleshov MV, Jones MR, Rouillard AD, Fernandez NF, Duan Q, Wang Z, Koplev S,  
127 Jenkins SL, Jagodnik KM, Lachmann A: **Enrichr: a comprehensive gene set**  
128 **enrichment analysis web server 2016 update.** *Nucleic acids research* 2016,  
129 **44**(W1):W90-W97.
- 130 4. Hunter S, Apweiler R, Attwood TK, Bairoch A, Bateman A, Binns D, Bork P, Das U,  
131 Daugherty L, Duquenne L: **InterPro: the integrative protein signature database.**  
132 *Nucleic acids research* 2009, **37**(suppl\_1):D211-D215.
- 133 5. Rodrigues CH, Pires DE, Ascher DB: **DynaMut: predicting the impact of mutations**  
134 **on protein conformation, flexibility and stability.** *Nucleic acids research* 2018,  
135 **46**(W1):W350-W355.
- 136
